# Supplementary material
Source: PubMed Central journal article supplement (PMC2963038)
Supplement: NIHMS148412-supplement-Supp.pdf [file NIHMS148412-supplement-Supp.pdf]

Supporting Information for:

**Probing the Aglycon Specificity of an Engineered Glycosyltransferase**

Richard W. Gantt, Randal D. Goff, Gavin J. Williams, and Jon S. Thorson\*

University of Wisconsin National Cooperative Drug Discovery Group, Laboratory for  
Biosynthetic Chemistry, School of Pharmacy, 777 Highland Avenue, Madison, WI 53705, USA  
E-mail: jsthorson@pharmacy.wisc.edu

**Table of Contents**

|                                                                                                                     |     |
|---------------------------------------------------------------------------------------------------------------------|-----|
| 1. Full citations of references [13], [22], [30], and [35] .....                                                    | S2  |
| 2. General methods .....                                                                                            | S2  |
| 3. Protein expression and purification .....                                                                        | S2  |
| 4. Acceptor library screening.....                                                                                  | S3  |
| 5. Determination of kinetic parameters .....                                                                        | S3  |
| 5.1. Supplementary Table 1 .....                                                                                    | S4  |
| 6. Scale-up and characterization of<br>representative glucosides ( <b>140-143</b> ).....                            | S4  |
| 6.1. General reaction procedure.....                                                                                | S4  |
| 6.2. Phenyl $\beta$ -D-glucopyranoside ( <b>140</b> ).....                                                          | S5  |
| 6.3. Phenyl 1-thio- $\beta$ -D-glucopyranoside ( <b>141</b> ).....                                                  | S5  |
| 6.4. Phenyl 1-amino- $\beta$ -D-glucopyranoside ( <b>142</b> ).....                                                 | S5  |
| 6.5. Phenyl $\beta$ -D-glucopyranose-(1 $\rightarrow$ 2)-<br>1-thio- $\beta$ -D-glucopyranoside ( <b>143</b> )..... | S5  |
| 7. Aglycon syntheses and spectral data.....                                                                         | S5  |
| 7.1. General reductive amination procedure .....                                                                    | S5  |
| 7.2. <i>N</i> -methoxy-2-naphthalenemethanamine ( <b>26</b> ).....                                                  | S6  |
| 7.3. <i>N</i> -methoxy-1-naphthalenemethanamine ( <b>48</b> ).....                                                  | S6  |
| 7.4. <i>N</i> -methoxybenzylamine ( <b>115</b> ) .....                                                              | S7  |
| 8. Acceptor library screening summary and methods .....                                                             | S8  |
| 8.1 Data summary .....                                                                                              | S8  |
| 8.2 HPLC methods .....                                                                                              | S11 |
| 8.3 Representative HPLC traces.....                                                                                 | S12 |
| 9. Structures of acceptor library members .....                                                                     | S13 |
| 10. $^1\text{H}$ and $^{13}\text{C}$ NMR spectra .....                                                              | S31 |
| 11. Supplementary references .....                                                                                  | S47 |

## 1. Full citations of references [13], [22], [30], and [35].

- [13] M. Veyhl, K. Wagner, C. Volk, V. Gorboulev, K. Baumgarten, W. Weber, M. Schaper, B. Bertram, M. Wiessler, H. Koepsell, *Proc. Natl. Acad. Sci. USA* **1998**, *95*, 2914-2919.
- [22] J. P. Holland, F. I. Aigbirhio, H. M. Betts, P. D. Bonnitcho, P. Burke, M. Christlieb, G. C. Churchill, A. R. Cowley, J. R. Dilworth, P. S. Donnelly, J. C. Green, J. M. Peach, S. R. Vasudevan, J. E. Warren, *Inorg. Chem.* **2007**, *46*, 465-485.
- [30] C. Zhang, C. Albermann, X. Fu, N. R. Peters, J. D. Chisholm, G. Zhang, E. J. Gilbert, P. G. Wang, D. L. Van Vranken, J. S. Thorson, *ChemBioChem* **2006**, *7*, 795-804.
- [35] D. N. Bolam, S. Roberts, M. R. Proctor, J. P. Turkenburg, E. J. Dodson, C. Martinez-Fleites, M. Yany, B. G. Davis, G. J. Davies, H. J. Gilbert, *Proc. Natl. Acad. Sci. USA* **2007**, *104*, 5336-5341.

**2. General methods.** All chemicals and reagents were purchased from Sigma-Aldrich, Fluka, or New England Biolabs unless otherwise stated. In addition to the previously reported putative aglycons [(**11**, **118-119**)<sup>[S1]</sup> (**14**, **32**, and **38**)<sup>[S2]</sup> (**45**, **70** and **139**)<sup>[S3]</sup> **55**,<sup>[S4]</sup> **73**<sup>[S5]</sup> and **132-136**<sup>[S6]</sup>], **29**, **50**, and **56** were a gift from Prof. Joe Langenhan, Seattle Univ.; **39** was a gift from Prof. Ben Shen, Univ. of Wisconsin-Madison; **74** and **127** were a gift from Prof. Dr. Sarah O'Connor, Massachusetts Inst. of Tech., USA; **85** was a gift from Prof. Dr. Michael Thomas, Univ. of Wisconsin-Madison; **105-112** were a gift from Prof. Dr. David L. Jakeman, Dalhousie University, Nova Scotia; **41** and **64** were isolated from fermentation; and the synthesis of **16** and **136** (Timmons, S. unpublished) will be reported elsewhere. Plasmid pET28/OleD was obtained from Prof. Hung-Wen Liu (Univ. of Texas-Austin, Austin, USA). LC/ESI-MS mass spectra were obtained using electrospray ionization on an Agilent 1100 HPLC-MSD SL quadrupole mass spectrometer connected to a UV/Vis diode array detector. High resolution mass spectra were determined utilizing electrospray ionization on a Waters (Micromass) LCT instrument (Beverly, MA, USA) with a time-of-flight analyzer and all HRMS samples contained an aliquot of a known compound (lock mass). Routine TLC analyses were accomplished on aluminum TLC plates coated with 0.2 mm silica gel from Sigma-Aldrich and monitoring at 254 nm. Flash column chromatography was achieved on 40 – 63  $\mu\text{m}$ , 60  $\text{\AA}$  silica gel (Silicycle, Quebec, Canada). Unless otherwise noted, compounds were characterized by NMR with a UNITY INOVA 400 MHz instrument (Varian, Palo Alto, CA, USA) in conjunction with a QN Switchable BB probe (Varian, Palo Alto, CA, USA).  $^1\text{H}$  and  $^{13}\text{C}$  chemical shifts were referenced to internal solvent resonances and reported relative to TMS. Multiplicities are indicated by s (singlet), d (doublet), t (triplet), q (quartet), qn (quintet), m (multiplet) and br (broad). Italicized elements or groups are those that are responsible for the shifts. Chemical shifts are reported in parts per million (ppm) and coupling constants  $J$  are given in Hz. NMR assignments were performed with the aid of COSY, TOCSY, HSQC, and HMBC experiments.

**3. Protein expression and purification.** Single colonies of *E. coli* BL21(DE3)pLysS (Stratagene, La Jolla, CA, USA) transformed with either pET28a/OleD or pET28a/OleD[A242V/S132F/P67T] vector<sup>[S7]</sup> were used to inoculate 3 mL LB medium supplemented with 50  $\mu\text{g mL}^{-1}$  kanamycin and cultured overnight at 37°C. The entire starter culture was then transferred to 1 L LB medium supplemented with 50  $\mu\text{g mL}^{-1}$  kanamycin and grown at 37°C until the OD600 reached ~0.7. Isopropyl  $\beta$ -D-thiogalactoside (IPTG) was subsequently added to a final concentration of 0.4 mM and the culture was incubated at 28°C for approximately 18 hours. Cell pellets were collected by centrifugation at 10,000  $g$  at 4°C for 20 min and the supernatant discarded. Pellets were resuspended in 10 mL lysis buffer (20 mM phosphate buffer, pH 7.4, 0.5 M NaCl, 10 mM imidazole) and were lysed by sonication. Cell debris was removed by centrifugation at 10,000  $g$  at 4°C for 20 min and the cleared supernatant immediately applied to 2 mL of nickel nitrilotriacetic acid (Ni-NTA) resin (QIAGEN)

Valencia, CA, USA) pre-equilibrated with lysis buffer. Protein was allowed to bind for 30 min at 4°C with gentle agitation, and the resin washed with 50 mL lysis buffer (x 4). Finally, the enzyme was eluted by incubation of the resin with 2 mL lysis buffer containing 250 mM imidazole for 10 min at 4°C with gentle agitation. The purified protein was applied to a PD-10 desalting column (Amersham Biosciences, Piscataway, NJ, USA), equilibrated with 50 mM Tris-HCl (pH 8.0), and eluted as described by the manufacturer. Protein aliquots were immediately flash frozen in liquid nitrogen and stored at -80°C. Protein purity was confirmed by SDS-PAGE to be >95% and protein concentration for all studies was determined using the Bradford Protein Assay Kit from Bio-Rad (Hercules, CA, USA).

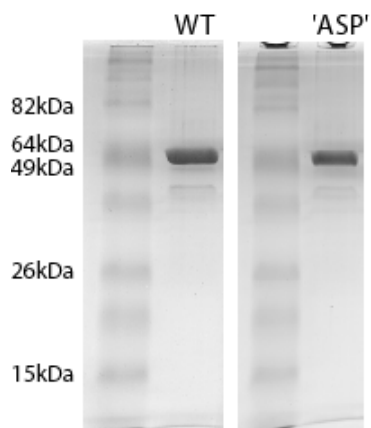

**Supplementary Figure 1.** SDS-PAGE gel of purified WT and 'ASP' OleD. Molecular weights for the standard ladder are labeled at left.

**4. Acceptor library screening.** Reactions were conducted in a final volume of 100  $\mu$ L and contained 50  $\mu$ g of purified enzyme, 2.5 mM UDP-glucose, 50 mM Tris-HCl (pH 8.0), 5 mM  $MgCl_2$ , and 1 mM of aglycon unless otherwise noted. Two separate control reactions for each aglycon that withheld either enzyme or UDP-glucose were performed in parallel. Reactions were allowed to proceed at 25 °C for ~16 hr, quenched with an equal volume of MeOH, centrifuged at 10,000 g for 10 min and the supernatant removed for analysis. The clarified reaction mixtures were analyzed by analytical reverse-phase HPLC with a 250 mm x 4.6 mm Gemini 5 $\mu$  C18 column (Phenomenex, Torrance, CA, USA) using various methods (See **Supp. Info. 8.2.**). HPLC peak areas were integrated with Star Chromatography Workstation Software (Varian, Palo Alto, CA, USA) and the total percent conversion calculated as a percent of the total peak area of substrate and product(s). Reactions which displayed potential new product(s) via HPLC were further analyzed by tandem LC/ESI-MS using a 250 mm x 4.6 mm Gemini 5 $\mu$  C18 analytical column. If both WT and 'ASP' reactions resulted in chromatographically identical product(s), only the reaction with the highest percent conversion was analyzed via LC-MS. Chromatographic methods, reactant and product retention times, and MS determinations for all positive substrates are summarized in **Supp. Info. 8.1-8.2.**

**5. Determination of Kinetic Parameters.** Assays were performed in a final volume of 200  $\mu$ L 50 mM Tris-HCl (pH 8.0), and contained constant concentrations of enzyme (40  $\mu$ g for 'ASP' reactions or 120  $\mu$ g for WT reactions) and saturating UDP-glucose (2.5 mM) while varying the phenol (**8**), thiophenol (**6**), or aniline (**34**) concentration (0-50 mM). Aliquots (50  $\mu$ L) were removed at 10 min (where the rate of product formation was determined to be linear), mixed with an equal volume of ice cold MeOH, and centrifuged at 10,000 g for 10 min. Supernatants were analyzed by analytical reverse-phase HPLC as described in the preceding section. HPLC peak areas were integrated with Star Chromatography Workstation Software (Varian, Palo Alto, CA, USA) and the total percent conversion calculated as a percent of the total peak area of substrate and product(s). All experiments were performed in triplicate. Initial velocities were fitted to the Michaelis-Menten equation using Origin Pro 7.0 software. OleD wild-type enzyme could not be saturated with acceptors **8**, **6**, and **34**. Consequentially,  $k_{cat}/K_m$  for wild-type was determined by linear regression.

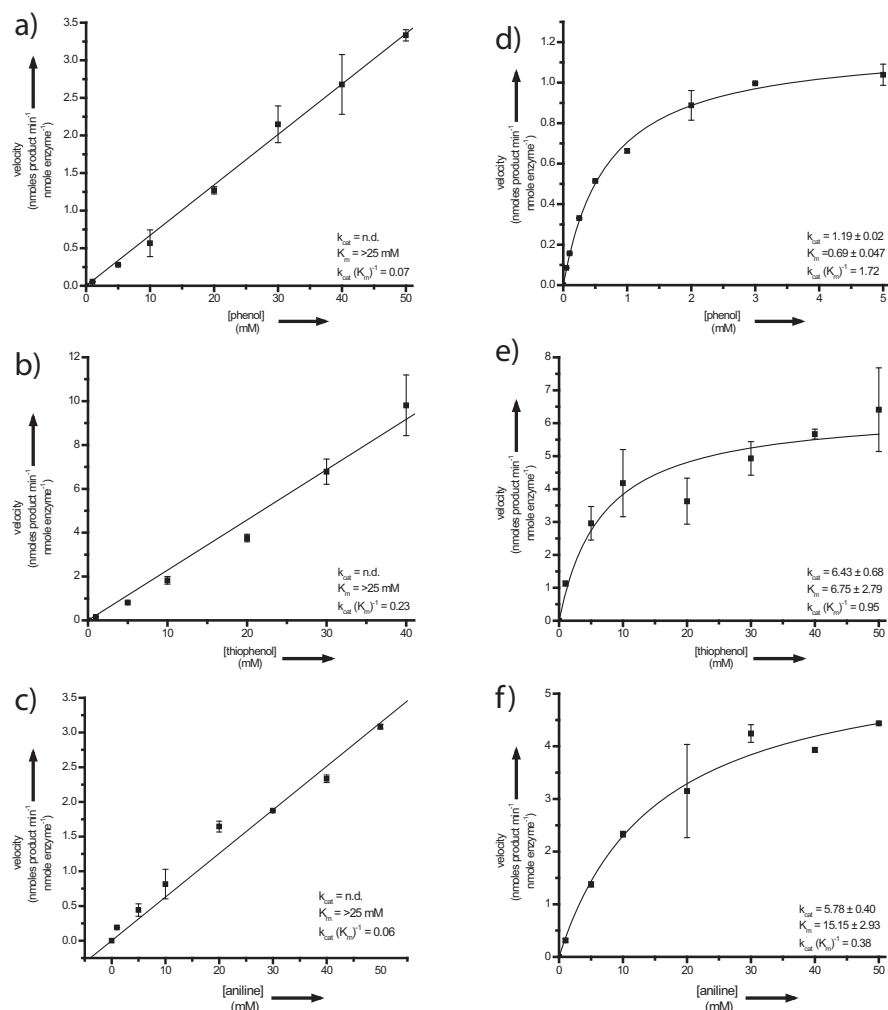

**Supplementary Figure 2.** Determination of kinetic parameters for WT and 'ASP' OleD; experiments were performed in triplicate with standard deviation noted. WT with varied acceptors (a) **8**, (b) **6**, and (c) **34**. 'ASP' with varied acceptor (d) **8**, (e) **6**, and (f) **34**.

**5.1. Supplementary Table 1.** Kinetic parameters determined for WT and 'ASP' OleD with phenol (**8**), thiophenol (**6**), or aniline (**34**) and saturating [UDP-Glc].

| Substrate                  | Enzyme | $k_{cat}$ ( $\text{min}^{-1}$ ) | $K_m$ (mM)       | $k_{cat} / K_m$ ( $\text{mM}^{-1}\text{min}^{-1}$ ) | $(k_{cat} / K_m)_{ASP} / (k_{cat} / K_m)_{WT}$ |
|----------------------------|--------|---------------------------------|------------------|-----------------------------------------------------|------------------------------------------------|
| phenol<br>( <b>8</b> )     | WT     | n.a. <sup>[a]</sup>             | n.a.             | 0.07                                                | ---                                            |
|                            | 'ASP'  | $1.19 \pm 0.02$                 | $0.69 \pm 0.05$  | 1.72                                                | 24.6                                           |
| thiophenol<br>( <b>6</b> ) | WT     | n.a.                            | n.a.             | 0.23                                                | ---                                            |
|                            | 'ASP'  | $6.43 \pm 0.68$                 | $6.75 \pm 2.79$  | 0.95                                                | 4.1                                            |
| aniline<br>( <b>34</b> )   | WT     | n.a.                            | n.a.             | 0.08                                                | ---                                            |
|                            | 'ASP'  | $5.78 \pm 0.40$                 | $15.15 \pm 2.93$ | 0.38                                                | 4.8                                            |

<sup>[a]</sup> n.a., not available

## 6. Scale-Up and Characterization of Representative Glucosides.

**6.1. General Reaction Procedure.** Reactions were conducted in 10 mL Tris-HCl (50 mM, pH 8.0) containing substrate **6**, **8**, or **24** (20 mM), UDP-glucose (100 mM), and  $\text{MgCl}_2$  (5 mM) at 25 °C with agitation. Aliquots of 'ASP' enzyme (4.4 mg) were added to each reaction at 0, 7,

and 19 hours. The reactions allowed to proceed for a total of 42 hours and were subsequently frozen (-80°C), lyophilized, resuspended in 2 mL of ice cold MeOH, and filtered. Glucosides were isolated by collecting fractions from analytical reverse-phase HPLC with a 250 mm x 4.6 mm Gemini 5 $\mu$  C18 column (Phenomenex, Torrance, CA, USA) using the appropriate method (**Supp. Info. 8.2**). The product-containing fractions were subsequently collected and lyophilized. Products were confirmed by HRMS as previously described and via  $^1\text{H}$  and  $^{13}\text{C}$  NMR using a Varian <sup>UNITY</sup>INOVA 500 MHz instrument (Palo Alto, CA, USA) with a Protasis/MRM CapNMR capillary probe (Savoy, IL, USA).  $^{13}\text{C}$  assignments were attained through gHSQC and gHMBC methods.

**6.2. Phenyl  $\beta$ -D-glucopyranoside (140).**  $^1\text{H}$  NMR ( $\text{CD}_3\text{OD}$ , 500 MHz)  $\delta$  7.32 (m, 2 H,  $\text{H}_{3'}$ ), 7.14 (d,  $J = 8.2$  Hz, 2 H,  $\text{H}_{2'}$ ), 7.05 (m, 1 H,  $\text{H}_{4'}$ ), 4.96 (d,  $J = 6.7$  Hz, 1 H,  $\text{H}_{1'}$ ), 3.94 (d,  $J = 12.0$  Hz, 1 H,  $\text{H}_{6\text{A}}$ ), 3.75 (dd,  $J = 12.0, 5.0$  Hz, 1 H,  $\text{H}_{6\text{B}}$ ), 3.55-3.45 (m, 4 H,  $\text{H}_{2-5}$ );  $^{13}\text{C}$  NMR ( $\text{CD}_3\text{OD}$ , 500 MHz)  $\delta$  158.0 ( $\text{C}_{1'}$ ), 129.3, ( $\text{C}_{3'}$ ), 122.3 ( $\text{C}_{4'}$ ), 116.6 ( $\text{C}_{2'}$ ), 101.2 ( $\text{C}_1$ ), 76.9 ( $\text{C}_5$ ), 73.8 ( $\text{C}_2$ ), 70.3 ( $\text{C}_4$ ), 63.4 ( $\text{C}_3$ ), 61.4 ( $\text{C}_6$ ); HRMS-ESI ( $m/z$ ):  $[\text{M}+\text{Na}]^+$  calcd for  $\text{C}_{12}\text{H}_{16}\text{NaO}_6$ , 279.0840; found 279.0833.

**6.3. Phenyl 1-thio- $\beta$ -D-glucopyranoside (141).**  $^1\text{H}$  NMR ( $\text{CD}_3\text{OD}$ , 500 MHz)  $\delta$  7.64 (d,  $J = 7.3$  Hz, 2 H,  $\text{H}_{2'}$ ), 7.38 (m, 2 H,  $\text{H}_{3'}$ ), 7.35-7.30 (m, 1 H,  $\text{H}_{4'}$ ), 4.68 (d,  $J = 9.6$  Hz, 1 H,  $\text{H}_{1'}$ ), 3.95 (d,  $J = 12.0$  Hz, 1 H,  $\text{H}_{6\text{A}}$ ), 3.74 (dd,  $J = 12.0, 5.2$  Hz, 1 H,  $\text{H}_{6\text{B}}$ ), 3.46 (m, 1 H,  $\text{H}_3$ ), 3.43-3.24 (m, 2 H,  $\text{H}_{4,5}$ ), 3.29 (m, 1 H,  $\text{H}_2$ );  $^{13}\text{C}$  NMR ( $\text{CD}_3\text{OD}$ , 500 MHz)  $\delta$  134.2 ( $\text{C}_{1'}$ ), 131.5 ( $\text{C}_2$ ), 128.8 ( $\text{C}_3$ ), 127.2 ( $\text{C}_4$ ), 88.2 ( $\text{C}_1$ ), 80.9 ( $\text{C}_4$ ), 78.6 ( $\text{C}_3$ ), 72.6 ( $\text{C}_2$ ), 70.2 ( $\text{C}_5$ ), 61.7 ( $\text{C}_6$ ); HRMS-ESI ( $m/z$ ):  $[\text{M}+\text{Na}]^+$  calcd for  $\text{C}_{12}\text{H}_{16}\text{NaO}_5\text{S}$ , 295.0611; found 295.0624.

**6.4. Phenyl 1-amino- $\beta$ -D-glucopyranoside (142).**  $^1\text{H}$  NMR ( $\text{CD}_3\text{OD}$ , 500 MHz)  $\delta$  7.16 (m, 2 H,  $\text{H}_{3'}$ ), 6.81 (d,  $J = 7.6$  Hz, 2 H,  $\text{H}_{2'}$ ), 6.73 (m, 1 H,  $\text{H}_{4'}$ ), 4.57 (d,  $J = 7.8$  Hz, 1 H,  $\text{H}_{1'}$ ), 3.87 (d,  $J = 11.7$  Hz, 1 H,  $\text{H}_{6\text{A}}$ ), 3.73-3.66 (m, 1 H,  $\text{H}_{6\text{B}}$ ), 3.49 (t,  $J = 7.9$  Hz, 1 H,  $\text{H}_3$ ), 3.44-3.33 (m, 3 H,  $\text{H}_{2,4,5}$ );  $^{13}\text{C}$  NMR ( $\text{CD}_3\text{OD}$ , 500 MHz)  $\delta$  147.0 ( $\text{C}_{1'}$ ), 128.8, ( $\text{C}_{3'}$ ), 118.4 ( $\text{C}_{4'}$ ), 113.9 ( $\text{C}_{2'}$ ), 85.8 ( $\text{C}_1$ ), 77.9 ( $\text{C}_3$ ), 77.2 ( $\text{C}_5$ ), 73.5 ( $\text{C}_4$ ), 70.7 ( $\text{C}_2$ ), 61.6 ( $\text{C}_6$ ); HRMS-ESI ( $m/z$ ):  $[\text{M}+\text{H}]^+$  calcd for  $\text{C}_{12}\text{H}_{16}\text{NNaO}_5$ , 278.0999; found 278.1006.

**6.5. Phenyl  $\beta$ -D-glucopyranose-(1 $\rightarrow$ 2)-1-thio- $\beta$ -D-glucopyranoside (143).**  $^1\text{H}$  NMR (acetone- $d_6$ , 500 MHz)  $\delta$  7.61 (m, 2 H,  $\text{H}_{2'}$ ), 7.33 (m, 2 H,  $\text{H}_{3'}$ ), 7.28 (m, 1 H,  $\text{H}_{4'}$ ), 4.77 (d,  $J = 9.8$  Hz, 1 H,  $\text{H}_{1'}$ ), 4.65 (d,  $J = 7.8$  Hz, 1 H,  $\text{H}_1$ ), 3.91-3.85 (m, 2 H,  $\text{H}_{6\text{A},6\text{A}'}$ ), 3.73-3.66 (m, 3 H,  $\text{H}_{3',6\text{B},6\text{B}'}$ ), 3.51-3.47 (m, 1 H,  $\text{H}_2$ ), 3.46-3.37 (m, 5 H,  $\text{H}_{3-5,4',5'}$ ), 3.31-3.27 (m, 1 H,  $\text{H}_2$ );  $^{13}\text{C}$  NMR (acetone- $d_6$ , 500 MHz)  $\delta$  131.5 ( $\text{C}_{2'}$ ), 128.9 ( $\text{C}_{3'}$ ), 127.1 ( $\text{C}_{4'}$ ), 104.6 ( $\text{C}_1$ ), 85.7 ( $\text{C}_{1'}$ ), 81.8 ( $\text{C}_2$ ), 80.7, 78.5 ( $\text{C}_3$ ), 77.3, 76.9, 75.3 ( $\text{C}_2$ ), 71.0, 70.3, 62.4 ( $\text{C}_6/\text{C}_6'$ ), 62.3 ( $\text{C}_6/\text{C}_6'$ ); MS-ESI ( $m/z$ ):  $[\text{M}+\text{Cl}]^-$  calcd for  $\text{C}_{18}\text{H}_{26}\text{ClO}_{10}\text{S}$ , 469.1; 469.0 observed.<sup>1</sup>

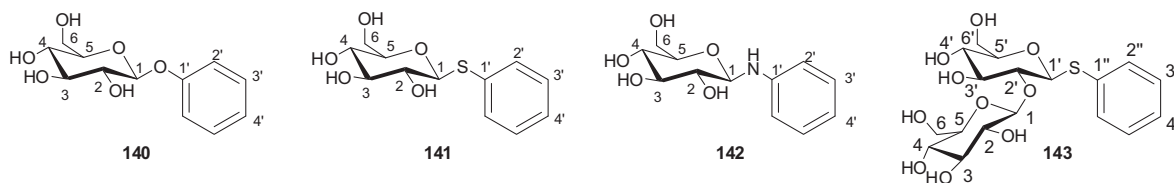

<sup>1</sup> The disaccharide linkage of **143** was determined to be 1 $\rightarrow$ 2 through comparison of COSY and TOCSY NMR experiments of the peracetylated analogs of **143** and its monosaccharide, **141**. The H2 proton of peracetylated **141** appears at 4.97 ppm ( $\text{CDCl}_3$ , 500 MHz), while the H2 proton of the proximal sugar of peracetylated **143** is at 3.86 ppm, indicating the position of glycosylation.

## 7. Aglycon syntheses and spectral data.

**7.1. General reductive amination procedure.** Aldehyde (12.5 mmol) was dissolved in  $\text{CH}_2\text{Cl}_2$  to a final concentration of 0.45 M. To this was added 1.4 equivalents of  $\text{MeONH}_2\cdot\text{HCl}$  and 2.2 equivalents of pyridine and the mixture was stirred for 2 hours at RT. TLC analysis at this stage revealed the substrate to be completely consumed with two products being formed. The reaction mixture was subsequently washed with 5% aqueous HCl (3 x 50 mL) and saturated NaCl (2 x 50 mL). The resulting organic layer was dried over  $\text{Na}_2\text{SO}_4$  and concentrated under reduced pressure to provide the crude oxime (>80%) which was used in subsequent reactions without further purification.

Crude oxime was dissolved in EtOH to a final concentration of 1.5 M. The reaction mixture was cooled to 0 °C, 3 equivalents of  $\text{NaBH}_3\text{CN}$  were added, and the solution was stirred for 15 min. An equal volume of 20% HCl in EtOH chilled to 0 °C was subsequently added in a drop-wise fashion over 10 min. The reaction was then allowed to warm to RT and stirred overnight. TLC analysis revealed complete consumption of substrate and a single new product. The reaction was neutralized with the addition of  $\text{Na}_2\text{CO}_3$  until the evolution of gas halted, concentrated under reduced pressure, and  $\text{CH}_2\text{Cl}_2$  (20 mL) was added. The resulting mixture was washed with saturated  $\text{NaHCO}_3$  (2 x 50 mL), dried over  $\text{Na}_2\text{SO}_4$ , and the collected organics concentrated under reduced pressure. The concentrate was purified by flash chromatography (1:1 hexanes: $\text{CH}_2\text{Cl}_2$ ) to yield the desired methoxyamine product in > 50% yield.

**7.2. N-methoxy-2-naphthalenemethanamine (26).** 2-Naphthaldehyde (**144**; 2.0 g, 12.5 mmol) provided of the desired oxime **145** (2.3 g, 99% crude yield) as a white solid. TLC  $R_f$  = 0.48, 0.60 (1:8 EtOAc:hexanes);  $^1\text{H}$  NMR (400 MHz,  $\text{CDCl}_3$ )  $\delta$  8.24 (s, 1 H, NCH), 7.92-7.80 (m, 5 H, Ph), 7.56-7.48 (m, 2 H, Ph), 4.058 (s, 3 H,  $\text{OCH}_3$ ),<sup>2</sup> 4.055 (s, 3 H,  $\text{OCH}_3$ );  $^{13}\text{C}$  NMR (100 MHz,  $\text{CDCl}_3$ )  $\delta$  148.0, 134.4, 133.5, 130.2, 128.9, 128.6, 128.6, 128.2, 127.2, 126.9, 62.4; HRMS-ESI ( $m/z$ ):  $[\text{M}+\text{H}]^+$  calcd for  $\text{C}_{12}\text{H}_{12}\text{NO}$ , 186.0841; found 186.0920.

Oxime **145** (2.3 gm, 12.4 mmol) yielded **26** (1.5 g, 63% yield) as an orange oil. TLC  $R_f$  = 0.36 (1:4 EtOAc:hexanes);  $^1\text{H}$  NMR (400 MHz,  $\text{CDCl}_3$ )  $\delta$  7.84-7.74 (m, 4 H, Ph), 7.52-7.39 (m, 3 H, Ph), 5.80 (br s, 1 H, NH), 4.18 (s, 2 H,  $\text{NHCH}_2$ ), 3.50 (t,  $J$  = 0.4 Hz, 3 H,  $\text{OCH}_3$ );  $^{13}\text{C}$  NMR (100 MHz,  $\text{CDCl}_3$ )  $\delta$  135.5, 133.7, 133.1, 128.4, 128.1, 128.0, 127.9, 127.2, 126.3, 126.1, 62.2, 56.6; HRMS-ESI ( $m/z$ ):  $[\text{M}+\text{H}]^+$  calcd for  $\text{C}_{12}\text{H}_{14}\text{NO}$ , 188.1070; found 188.1069.

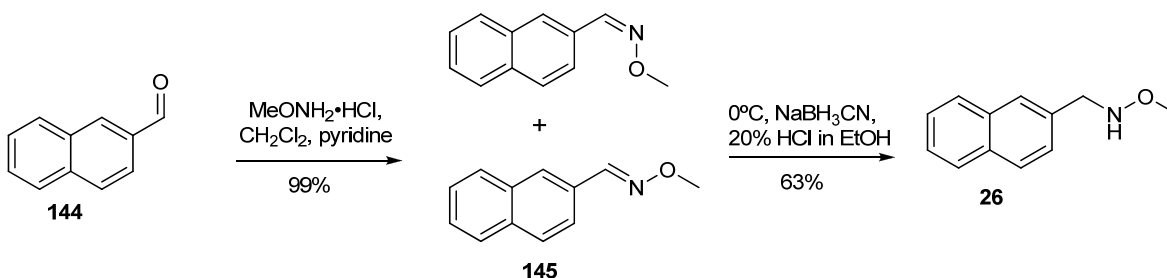

**7.3. N-methoxy-1-naphthalenemethanamine (48).** 1-Naphthaldehyde (**147**; 2.0 g, 12.7 mmol) gave oxime **148** (2.0 g, 83% crude yield) as a yellow oil. TLC  $R_f$  = 0.56, 0.65 (1:4 EtOAc:hexanes.);  $^1\text{H}$  NMR (400 MHz,  $\text{CDCl}_3$ )  $\delta$  8.71 (s, 1 H, NCH), 8.52 (m, 1 H, Ph), 7.84

<sup>2</sup> Signals observed in  $^1\text{H}$  spectrum at 4.058 and 4.055 for  $\text{OCH}_3$  are from the presence of (*E*) and (*Z*)-isomers.

(m, 2 H, Ph), 7.74 (m, 1 H, Ph), 7.58-7.42 (m, 3 H, Ph), 4.06 (s, 3 H, OCH<sub>3</sub>); <sup>13</sup>C NMR (100 MHz, CDCl<sub>3</sub>) δ 148.5, 133.9, 130.8, 130.5, 128.8, 128.1, 127.4, 127.1, 126.2, 125.4, 124.6, 62.2; HRMS-ESI (*m/z*): [M]<sup>++</sup> calcd for C<sub>12</sub>H<sub>11</sub>NO, 185.0836; found 185.0842.

Oxime **148** (2.0 gm, 10.5 mmol) yielded **48** (1.2 g, 63% yield) as a yellow oil. TLC R<sub>f</sub> = 0.41 (1:4::EtOAc:hexanes); <sup>1</sup>H NMR (400 MHz, CDCl<sub>3</sub>) δ 8.15 (d, *J* = 8.8 Hz, 1 H, Ph), 7.84 (d, *J* = 8.4 Hz, 1 H, Ph), 7.77 (d, *J* = 8.4 Hz, 1 H, Ph), 7.56-7.36 (m, 4 H, Ph), 5.77 (br s, 1 H, NH), 4.51 (s, 2 H, NHCH<sub>2</sub>), 3.53 (d, *J* = 0.4 Hz, 3 H, OCH<sub>3</sub>); <sup>13</sup>C NMR (100 MHz, CDCl<sub>3</sub>) δ 134.1, 133.0, 132.3, 129.0, 128.7, 127.8, 126.5, 126.0, 125.7, 124.0, 62.1, 54.1; HRMS-ESI (*m/z*): [M+H]<sup>+</sup> calcd for C<sub>12</sub>H<sub>14</sub>NO, 188.1070; found 188.1070.

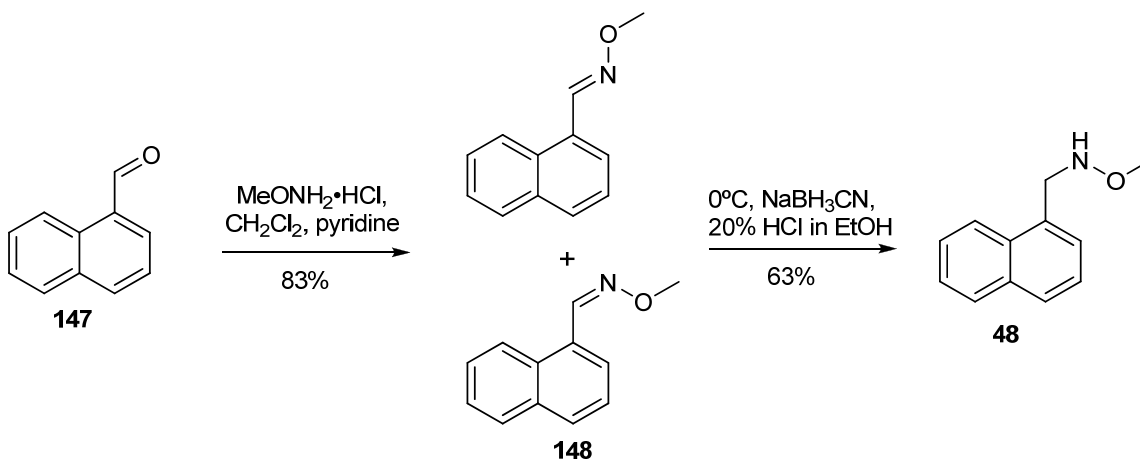

**7.4. N-methoxybenzylamine (115).** Benzaldehyde (**149**; 4.8 g, 49.2 mmol) afforded oxime **150** (6.1 g, 91% crude yield) as a colorless oil. TLC R<sub>f</sub> = 0.82 (1:8 EtOAc:hexanes); <sup>1</sup>H NMR (400 MHz, CDCl<sub>3</sub>) δ 8.03 (s, 1 H, NCH), 7.58-7.51 (m, 2 H, Ph), 7.37-7.32 (m, 3 H, Ph), 3.95 (s, 3 H, OCH<sub>3</sub>); <sup>13</sup>C NMR (100 MHz, CDCl<sub>3</sub>) δ 148.8, 132.5, 130.0, 129.0, 127.3, 62.2<sup>3</sup>; HRMS-ESI (*m/z*): [M]<sup>++</sup> calcd for C<sub>8</sub>H<sub>9</sub>NO, 135.0679; found 135.0684.

Oxime **150** (6.1 g, 44.9 mmol) provided desired methoxyamine **115** (3.3 g, 53% yield) as a colorless oil. TLC R<sub>f</sub> = 0.31 (1:8 EtOAc:hexanes); <sup>1</sup>H NMR (400 MHz, CDCl<sub>3</sub>) δ 7.38-7.22 (m, 5 H, Ph), 5.71 (br s, 1 H, NH), 4.04 (s, 2 H, CH<sub>2</sub>NH), 3.50 (d, *J* = 0.4 Hz, 3 H, OCH<sub>3</sub>); <sup>13</sup>C NMR (100 MHz, CDCl<sub>3</sub>) δ 137.9, 129.1, 128.7, 127.7, 62.1, 56.5<sup>4</sup>; HRMS-ESI (*m/z*): [M+H]<sup>+</sup> calcd for C<sub>8</sub>H<sub>12</sub>NO, 138.0914; found 138.0916.

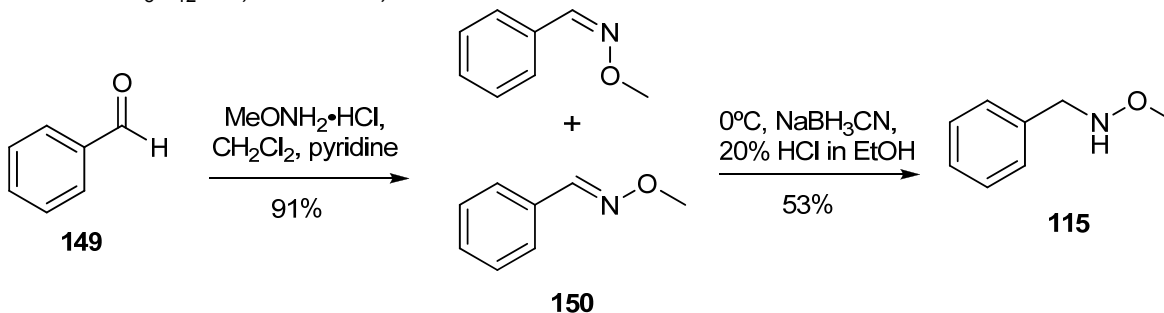

<sup>3</sup> Not all phenyl <sup>13</sup>C resonances were observed, presumably due to spectral overlap in the 132.5-127.3 ppm region.

<sup>4</sup> Not all phenyl <sup>13</sup>C resonances were observed, presumably due to spectral overlap in the 129.1-127.1 ppm region.

## 8. Acceptor library screening summary and methods.

### 8.1. Data summary.

| Compound Number | Compound Name       | WT % conversion <sup>(A)</sup>                                                                              | 'ASP' % conversion <sup>(A)</sup> | substrate retention time | calculated substrate mass (m/z) | observed substrate mass (m/z) | product retention time | expected product mass (m/z) | observed product mass (m/z)                          | product designation <sup>(B)</sup> | HPLC method <sup>(C)</sup> | comments |   |  |
|-----------------|---------------------|-------------------------------------------------------------------------------------------------------------|-----------------------------------|--------------------------|---------------------------------|-------------------------------|------------------------|-----------------------------|------------------------------------------------------|------------------------------------|----------------------------|----------|---|--|
| 3               | benzhydrol          | >99.9                                                                                                       | >99.9                             | 19.7                     | 184.2                           | n.f.                          | 12.9                   | 508.2                       | 531.0 [M+Na] <sup>+</sup>                            | DI                                 | A                          |          |   |  |
|                 |                     |                                                                                                             |                                   |                          |                                 |                               | 13.3                   | 508.2                       | 531.0 [M+Na] <sup>+</sup>                            | DI                                 |                            |          |   |  |
|                 |                     |                                                                                                             |                                   |                          |                                 |                               | 14.0                   | 346.4                       | 361.2 [M+Cl] <sup>-</sup>                            | MONO                               |                            |          |   |  |
| 4               | $\beta$ -zearalenol | 91.8                                                                                                        | >99.9                             | 18.1                     | 320.2                           | 321.2 [M+H] <sup>+</sup>      | 8.1                    | 482.2                       | 483.2 [M+H] <sup>+</sup>                             | MONO                               | A                          |          |   |  |
|                 |                     |                                                                                                             |                                   |                          |                                 |                               | 9.8                    | 482.2                       | 483.2 [M+H] <sup>+</sup>                             | MONO                               |                            |          |   |  |
|                 |                     |                                                                                                             |                                   |                          |                                 |                               | 9.7                    | 644.3                       | 679.2 [M+Cl] <sup>-</sup>                            | DI                                 |                            |          |   |  |
|                 |                     |                                                                                                             |                                   |                          |                                 |                               | 10.5                   | 644.3                       | 667.7 [M+Na] <sup>+</sup>                            | DI                                 |                            |          |   |  |
|                 |                     |                                                                                                             |                                   |                          |                                 |                               | 11.7                   | 482.2                       | 483.2 [M+H] <sup>+</sup>                             | MONO                               |                            |          |   |  |
|                 |                     |                                                                                                             |                                   |                          |                                 |                               | 12.7                   | 644.3                       | 643.2 [M-H] <sup>-</sup>                             | DI                                 |                            |          |   |  |
|                 |                     |                                                                                                             |                                   |                          |                                 |                               | 12.8                   | 644.3                       | 643.2 [M-H] <sup>-</sup>                             | DI                                 |                            |          |   |  |
|                 |                     |                                                                                                             |                                   |                          |                                 |                               | 13.9                   | 482.2                       | 483.2 [M+H] <sup>+</sup>                             | MONO                               |                            |          |   |  |
|                 |                     |                                                                                                             |                                   |                          |                                 |                               | 11.7                   | 382.0                       | 409.4 [M+Na] <sup>+</sup>                            | MONO                               |                            |          | A |  |
|                 |                     |                                                                                                             |                                   |                          |                                 |                               | 8.4                    | 434.1                       | 469.0 [M+Cl] <sup>-</sup>                            | DI                                 |                            |          | A |  |
| 9.4             | 272.1               | 307.2 [M+Cl] <sup>-</sup>                                                                                   | MONO                              | A                        |                                 |                               |                        |                             |                                                      |                                    |                            |          |   |  |
| 8.7             | 338.3               | 373.2 [M+Cl] <sup>-</sup> ; 339.0 [M+H] <sup>+</sup>                                                        | MONO                              | A                        | 0.2 mM final concentration      |                               |                        |                             |                                                      |                                    |                            |          |   |  |
| 7.9             | 256.3               | 291.2 [M+Cl] <sup>-</sup>                                                                                   | MONO                              | A                        |                                 |                               |                        |                             |                                                      |                                    |                            |          |   |  |
| 9               | kaempferol          | 71.3                                                                                                        | 88.0                              | 17.4                     | 286.0                           | 285.0 [M+H] <sup>+</sup>      | 7.1                    | 448.1                       | 483.0 [M+Cl] <sup>-</sup>                            | MONO                               | A                          |          |   |  |
|                 |                     |                                                                                                             |                                   |                          |                                 |                               | 8.2                    | 610.2                       | 609.0 [M-H] <sup>-</sup>                             | DI                                 |                            |          |   |  |
|                 |                     |                                                                                                             |                                   |                          |                                 |                               | 8.6                    | 610.2                       | 609.0 [M-H] <sup>-</sup>                             | DI                                 |                            |          |   |  |
|                 |                     |                                                                                                             |                                   |                          |                                 |                               | 8.8                    | 610.2                       | 609.0 [M-H] <sup>-</sup>                             | DI                                 |                            |          |   |  |
|                 |                     |                                                                                                             |                                   |                          |                                 |                               | 9.5                    | 610.2                       | 639.9 [M+H] <sup>+</sup> ; 645.0 [M+Cl] <sup>-</sup> | DI                                 |                            |          |   |  |
|                 |                     |                                                                                                             |                                   |                          |                                 |                               | 10.0                   | 610.2                       | 609.0 [M-H] <sup>-</sup> ; 645.0 [M+Cl] <sup>-</sup> | DI                                 |                            |          |   |  |
|                 |                     |                                                                                                             |                                   |                          |                                 |                               | 10.9                   | 610.2                       | 609.0 [M-H] <sup>-</sup>                             | DI                                 |                            |          |   |  |
|                 |                     |                                                                                                             |                                   |                          |                                 |                               | 11.2                   | 610.2                       | 645.0 [M+Cl] <sup>-</sup>                            | DI                                 |                            |          |   |  |
|                 |                     |                                                                                                             |                                   |                          |                                 |                               | 11.8                   | 610.2                       | 645.0 [M+Cl] <sup>-</sup>                            | DI                                 |                            |          |   |  |
|                 |                     |                                                                                                             |                                   |                          |                                 |                               | 12.3                   | 448.1                       | 447.0 [M-H] <sup>-</sup>                             | MONO                               |                            |          |   |  |
|                 |                     |                                                                                                             |                                   |                          |                                 |                               | 12.4                   | 448.1                       | 447.0 [M-H] <sup>-</sup>                             | MONO                               |                            |          |   |  |
|                 |                     |                                                                                                             |                                   |                          |                                 |                               | 12.8                   | 448.1                       | 447.0 [M-H] <sup>-</sup>                             | MONO                               |                            |          |   |  |
| 13.3            | 402.1               | 403.0 [M+H] <sup>+</sup>                                                                                    | MONO                              | A                        |                                 |                               |                        |                             |                                                      |                                    |                            |          |   |  |
| 12.8            | 565.3               | 566.0 [M+H] <sup>+</sup>                                                                                    | MONO                              | A                        | 0.25 mM final concentration     |                               |                        |                             |                                                      |                                    |                            |          |   |  |
| 9.6             | 301.3               | 336.4 [M+Cl] <sup>-</sup>                                                                                   | MONO                              | A                        |                                 |                               |                        |                             |                                                      |                                    |                            |          |   |  |
| 11.3            | 270.1               | 270.8 [M+H] <sup>+</sup> ; 292.8 [M+Na] <sup>+</sup> ; 268.8 [M+H] <sup>+</sup> ; 304.8 [M+Cl] <sup>-</sup> | MONO                              | C                        |                                 |                               |                        |                             |                                                      |                                    |                            |          |   |  |
| 11.89           | 746.1               | 781.0 [M+Cl] <sup>-</sup>                                                                                   | MONO                              | B                        | 0.1 final concentration         |                               |                        |                             |                                                      |                                    |                            |          |   |  |
| 13.8            | 299.1               | 300.2 [M+H] <sup>+</sup>                                                                                    | MONO                              | J                        |                                 |                               |                        |                             |                                                      |                                    |                            |          |   |  |
| 13.7            | 501.2               | 524.2 [M+Na] <sup>+</sup>                                                                                   | MONO                              | D                        |                                 |                               |                        |                             |                                                      |                                    |                            |          |   |  |
| 13.9            | 501.2               | 524.0 [M+Na] <sup>+</sup>                                                                                   | MONO                              |                          |                                 |                               |                        |                             |                                                      |                                    |                            |          |   |  |
| 14.2            | 501.2               | 524.0 [M+Na] <sup>+</sup>                                                                                   | MONO                              |                          |                                 |                               |                        |                             |                                                      |                                    |                            |          |   |  |
| 15.6            | 606.3               | 607.0 [M+H] <sup>+</sup>                                                                                    | MONO                              | E                        | 0.25 mM final concentration     |                               |                        |                             |                                                      |                                    |                            |          |   |  |
| 11.8            | 596.3               | 619.2 [M+Na] <sup>+</sup>                                                                                   | DI                                | A                        |                                 |                               |                        |                             |                                                      |                                    |                            |          |   |  |
| 13.1            | 596.3               | 619.4 [M+Na] <sup>+</sup>                                                                                   | DI                                |                          |                                 |                               |                        |                             |                                                      |                                    |                            |          |   |  |
| 14.7            | 434.2               | 435.4 [M+H] <sup>+</sup>                                                                                    | MONO                              |                          |                                 |                               |                        |                             |                                                      |                                    |                            |          |   |  |
| 13.3            | 493.2               | 494.2 [M+H] <sup>+</sup> ; 516.0 [M+Na] <sup>+</sup> ; 491.8 [M-H] <sup>-</sup> ; 528.2 [M+Cl] <sup>-</sup> | DI                                | G                        |                                 |                               |                        |                             |                                                      |                                    |                            |          |   |  |
| 14.0            | 331.1               | 331.6 [M+H] <sup>+</sup> ; 353.6 [M+Na] <sup>+</sup>                                                        | MONO                              |                          |                                 |                               |                        |                             |                                                      |                                    |                            |          |   |  |
| 8.2             | 478.2               | 513.0 [M+Cl] <sup>-</sup>                                                                                   | DI                                | A                        |                                 |                               |                        |                             |                                                      |                                    |                            |          |   |  |
| 11.7            | 316.1               | 351.0 [M+Cl] <sup>-</sup>                                                                                   | MONO                              |                          |                                 |                               |                        |                             |                                                      |                                    |                            |          |   |  |
| 16.2            | 482.2               | 505.0 [M+Na] <sup>+</sup>                                                                                   | DI                                | E                        |                                 |                               |                        |                             |                                                      |                                    |                            |          |   |  |
| 17.1            | 482.2               | 504.8 [M+Na] <sup>+</sup>                                                                                   | DI                                |                          |                                 |                               |                        |                             |                                                      |                                    |                            |          |   |  |
| 17.5            | 320.1               | 342.9 [M+Na] <sup>+</sup>                                                                                   | MONO                              |                          |                                 |                               |                        |                             |                                                      |                                    |                            |          |   |  |
| 10.3            | 286.3               | 321.2 [M+Cl] <sup>-</sup>                                                                                   | MONO                              | A                        |                                 |                               |                        |                             |                                                      |                                    |                            |          |   |  |
| 9.4             | 445.2               | 446.2 [M+H] <sup>+</sup> ; 468.2 [M+Na] <sup>+</sup>                                                        | DI                                | G                        |                                 |                               |                        |                             |                                                      |                                    |                            |          |   |  |
| 10.7            | 283.1               | 283.9 [M+H] <sup>+</sup> ; 305.9 [M+Na] <sup>+</sup>                                                        | MONO                              |                          |                                 |                               |                        |                             |                                                      |                                    |                            |          |   |  |
| 12.2            | 536.3               | 537.0 [M+H] <sup>+</sup>                                                                                    | MONO                              |                          |                                 |                               |                        |                             |                                                      |                                    |                            |          |   |  |
| 13.5            | 536.3               | 537.0 [M+H] <sup>+</sup>                                                                                    | MONO                              | A                        |                                 |                               |                        |                             |                                                      |                                    |                            |          |   |  |
| 13.0            | 323.0               | 328.8 [M+H] <sup>+</sup>                                                                                    | MONO                              | D                        | 0.2 mM final concentration      |                               |                        |                             |                                                      |                                    |                            |          |   |  |
| 11.6            | 511.2               | 510.2 [M+H] <sup>+</sup>                                                                                    | DI                                | G                        |                                 |                               |                        |                             |                                                      |                                    |                            |          |   |  |
| 12.1            | 511.2               | 534.2 [M+Na] <sup>+</sup>                                                                                   | DI                                |                          |                                 |                               |                        |                             |                                                      |                                    |                            |          |   |  |
| 13.6            | 349.1               | 372.2 [M+Na] <sup>+</sup>                                                                                   | MONO                              |                          |                                 |                               |                        |                             |                                                      |                                    |                            |          |   |  |
| 11.1            | 350.1               | 348.6 [M+H] <sup>+</sup> ; 384.8 [M+Cl] <sup>-</sup>                                                        | MONO                              | A                        |                                 |                               |                        |                             |                                                      |                                    |                            |          |   |  |
| 11.5            | 313.2               | 314.1 [M+H] <sup>+</sup>                                                                                    | MONO                              | E                        |                                 |                               |                        |                             |                                                      |                                    |                            |          |   |  |
| 15.9            | 613.3               | 613.8 [M+H] <sup>+</sup> ; 635.6 [M+Na] <sup>+</sup>                                                        | DI                                | D                        |                                 |                               |                        |                             |                                                      |                                    |                            |          |   |  |
| 17.2            | 451.1               | 452.2 [M+H] <sup>+</sup> ; 474.0 [M+Na] <sup>+</sup>                                                        | MONO                              |                          |                                 |                               |                        |                             |                                                      |                                    |                            |          |   |  |



| Compound Number | Compound Name                              | WT % Conversion | 'ASP' % Conversion | substrate retention time | calculated substrate mass (m/z) | observed substrate mass (m/z) |  | product retention time | expected product mass (m/z) | observed product mass (m/z)                          | product designation | HPLC method | comments                    |
|-----------------|--------------------------------------------|-----------------|--------------------|--------------------------|---------------------------------|-------------------------------|--|------------------------|-----------------------------|------------------------------------------------------|---------------------|-------------|-----------------------------|
| 30              | alazarin                                   | 27              | 31                 | 19.6                     | 240.0                           | 238.6 [M+H] <sup>+</sup>      |  | 13.4                   | 402.1                       | 425.0 [M+Na] <sup>+</sup> ; 400.8 [M+H] <sup>+</sup> | MONO                | A           |                             |
| 31              | cannabidiol                                | 49              | 29                 | 24.8                     | 314.2                           | 415.2 [M+H] <sup>+</sup>      |  | 24.5                   | 476.3                       | 477.3 [M+H] <sup>+</sup>                             | MONO                | E           | 0.1 mM final concentration  |
| 32              | pseudo-aglycon - calicheamicin fragment    | 43              | 27                 | 19.4                     | 1050.1                          | 1049.1 [M+H] <sup>+</sup>     |  | 9.9                    | 1212.1                      | 1247.1 [M+Cl] <sup>+</sup>                           | MONO                | B           | 0.1 mM final concentration  |
| 33              | <i>N</i> -methylaniline                    | 4.4             | 27.2               | 18.1                     | 107.1                           | n.f.                          |  | 8.1                    | 431.2                       | 432.2 [M+H] <sup>+</sup> ; 454.0 [M+Na] <sup>+</sup> | DI                  |             |                             |
|                 |                                            |                 |                    |                          |                                 |                               |  | 9.1                    | 269.1                       | 269.8 [M+H] <sup>+</sup> ; 291.8 [M+Na] <sup>+</sup> | MONO                | G           | 0.2 mM final concentration  |
| 34              | aniline                                    | 3               | 27                 | 12.8                     | 93.1                            | 94.2 [M+H] <sup>+</sup>       |  | 8.0                    | 255.1                       | 256.0 [M+H] <sup>+</sup>                             | MONO                | G           |                             |
| 35              | 1-pyrenemethanol                           | 2.6             | 26.7               | 22.5                     | 232.1                           | 255.0 [M+Na] <sup>+</sup>     |  | 14.0                   | 556.2                       | 591.2 [M+Cl] <sup>+</sup>                            | DI                  |             |                             |
|                 |                                            |                 |                    |                          |                                 |                               |  | 15.2                   | 556.2                       | 591.2 [M+Cl] <sup>+</sup>                            | DI                  | A           |                             |
|                 |                                            |                 |                    |                          |                                 |                               |  | 16.0                   | 394.1                       | 429.0 [M+Cl] <sup>+</sup>                            | MONO                |             |                             |
| 36              | ampicillin                                 | 3               | 27                 | 9.8                      | 349.1                           | 350.2 [M+H] <sup>+</sup>      |  | 15.4                   | 511.2                       | 511.8 [M+H] <sup>+</sup> ; 533.8 [M+Na] <sup>+</sup> | MONO                |             |                             |
|                 |                                            |                 |                    |                          |                                 |                               |  | 16.1                   | 511.2                       | 511.8 [M+H] <sup>+</sup> ; 533.8 [M+Na] <sup>+</sup> | MONO                | A           |                             |
| 37              | benzhydrilamine                            | 34              | 27                 | 19.1                     | 183.1                           | 208.0 [M+Na] <sup>+</sup>     |  | 18.1                   | 345.2                       | 345.8 [M+H] <sup>+</sup> ; 367.8 [M+Na] <sup>+</sup> | MONO                | E           |                             |
| 38              | α31 - calicheamicin fragment               | 21              | 25                 | 17.4                     | 1210.2                          | 1245.1 [M+Cl] <sup>+</sup>    |  | 15.2                   | 1372.2                      | 1407.1 [M+Cl] <sup>+</sup>                           | MONO                | B           | 0.1 mM final concentration  |
| 39              | fredericamycin A                           | 17              | 25                 | 23.6                     |                                 | 540.0 [M+H] <sup>+</sup>      |  | 10.0                   | 701.2                       | 700.8 [M+H] <sup>+</sup>                             | MONO                | A           | 0.25 mM final concentration |
| 40              | dynemicin A                                | 45              | 25                 | 24.9                     | 537.1                           | 537.8 [M+H] <sup>+</sup>      |  | 14.8                   | 699.6                       | 722.2 [M+Na] <sup>+</sup>                            | MONO                | M           | 0.1 mM final concentration  |
| 41              | hydramycin                                 | 7               | 24                 | 19.1                     | 408.1                           | 407.0 [M+H] <sup>+</sup>      |  | 15.7                   | 570.1                       | 569.0 [M+H] <sup>+</sup>                             | MONO                | L           |                             |
| 42              | 2-phenylethanethiol                        | 31              | 23                 | 22.8                     | 138.2                           | 172.2 [M+Cl] <sup>+</sup>     |  | 11.8                   | 300.1                       | 335.0 [M+Cl] <sup>+</sup>                            | MONO                | A           |                             |
| 43              | pyrimethamine                              | 36              | 21                 | 20.2                     | 248.1                           | 249.2 [M+H] <sup>+</sup>      |  | 17.8                   | 410.1                       | 411.2 [M+H] <sup>+</sup>                             | MONO                | J           |                             |
| 44              | 7-amino-4-methylcoumarin                   | 1               | 18                 | 12.3                     | 175.1                           | 176.2 [M+H] <sup>+</sup>      |  | 9.2                    | 337.3                       | 338.0 [M+H] <sup>+</sup>                             | MONO                | A           | 0.2 mM final concentration  |
| 45              | staurosporine aglycon                      | 5               | 15                 | 19.5                     | 311.1                           | 312.2 [M+H] <sup>+</sup>      |  | 14.6                   | 473.2                       | 474.8 [M+H] <sup>+</sup>                             | MONO                | A           | 0.05 mM final concentration |
| 46              | benzylalcohol                              | 8               | 14                 | 11.4                     | 108.1                           | 107.0 [M+H] <sup>+</sup>      |  | 8.75                   | 270.1                       | 305.0 [M+Cl] <sup>+</sup>                            | MONO                | A           |                             |
| 47              | phenylacetic hydrazide                     | 0               | 13                 | 12.8                     | 150.1                           | 151.2 [M+H] <sup>+</sup>      |  | 15.2                   | 312.1                       | 313.2 [M+H] <sup>+</sup>                             | MONO                | J           |                             |
| 48              | <i>N</i> -methoxy-1-naphthalenemethanamine | 18              | 11                 | 19.8                     | 187.1                           | 188.2 [M+H] <sup>+</sup>      |  | 13.5                   | 349.1                       | 350.2 [M+H] <sup>+</sup>                             | MONO                | H           |                             |
| 49              | brefeldin A                                | 1               | 10                 | 16.0                     | 280.2                           | 281.2 [M+H] <sup>+</sup>      |  |                        | 442.2                       | 477.2 [M+Cl] <sup>+</sup>                            | MONO                | A           |                             |
| 50              | <i>N</i> -ethoxybenzhydrilamine            | 41              | 10                 | 24.8                     | 227.1                           | 250.0 [M+Na] <sup>+</sup>     |  | 14.2                   | 389.2                       | 412.2 [M+Na] <sup>+</sup>                            | MONO                | D           |                             |
| 51              | benzaldehyde oxime                         | 3               | 9                  | 14.8                     | 121.1                           | 122.2 [M+H] <sup>+</sup>      |  | 9.9                    | 283.1                       | 284.2 [M+H] <sup>+</sup>                             | MONO                | A           |                             |
| 52              | benzoic hydrazide                          | 3               | 7                  | 5.7                      | 136.1                           | 137.0 [M+H] <sup>+</sup>      |  | 7.2                    | 298.1                       | 299.2 [M+H] <sup>+</sup>                             | MONO                | A           |                             |
| 53              | sulfanilamide                              | 0               | 6.7                | 10.6                     | 172.0                           | 173.1 [M+H] <sup>+</sup>      |  | 3.7                    | 334.1                       | 335.1 [M+H] <sup>+</sup>                             | MONO                |             |                             |
|                 |                                            |                 |                    |                          |                                 |                               |  | 5.9                    | 334.1                       | 335.1 [M+H] <sup>+</sup> ; 369.0 [M+Cl] <sup>+</sup> | MONO                | E           |                             |
| 54              | 4-biphenylacetic acid                      | 0.8             | 5.9                | 20.3                     | 212.1                           | 213.2 [M+H] <sup>+</sup>      |  | 15.9                   | 374.1                       | 397.0 [M+Na] <sup>+</sup>                            | MONO                |             |                             |
|                 |                                            |                 |                    |                          |                                 |                               |  | 16.0                   | 374.1                       | 397.0 [M+Na] <sup>+</sup>                            | MONO                | A           |                             |
|                 |                                            |                 |                    |                          |                                 |                               |  | 16.2                   | 374.1                       | 397.0 [M+Na] <sup>+</sup>                            | MONO                |             |                             |
| 55              | deacetyl-colchicine                        | 21              | 3                  | 11.0                     | 357.2                           | 358.0 [M+H] <sup>+</sup>      |  | 11.4                   | 519.0                       | 520.0 [M+H] <sup>+</sup>                             | MONO                |             | 0.5 mM final concentration  |
| 56              | <i>N</i> -methoxybenzhydrilamine           | 9               | 2                  | 23.6                     | 213.2                           | 248.6 [M+Cl] <sup>+</sup>     |  | 13.4                   | 375.2                       | 398.0 [M+Na] <sup>+</sup>                            | MONO                | D           |                             |
| 57              | nystatin A1                                | 41.6            | 0.0                | 15.2                     | 925.5                           | 926.0 [M+H] <sup>+</sup>      |  | 12.7                   | 1087.6                      | 1088.4 [M+H] <sup>+</sup>                            | MONO                |             |                             |
|                 |                                            |                 |                    |                          |                                 |                               |  | 13.9                   | 1087.6                      | 1087.8 [M+H] <sup>+</sup>                            | MONO                | F           | 0.25 mM final concentration |
|                 |                                            |                 |                    |                          |                                 |                               |  | 14.1                   | 1087.6                      | 1088.2 [M+H] <sup>+</sup>                            | MONO                |             |                             |
| 58              | 2-naphthoic acid                           | 0.2             | 4.6                | 17.4                     | 172.1                           | 173.2 [M+H] <sup>+</sup>      |  | 12.0                   | 334.1                       | 357.2 [M+Na] <sup>+</sup>                            | MONO                |             |                             |
|                 |                                            |                 |                    |                          |                                 |                               |  | 12.3                   | 334.1                       | 357.2 [M+Na] <sup>+</sup>                            | MONO                | A           |                             |
|                 |                                            |                 |                    |                          |                                 |                               |  | 12.6                   | 334.1                       | 357.2 [M+Na] <sup>+</sup>                            | MONO                |             |                             |
| 59              | 1-hydroxyanthraquinone                     | 3               | 4                  | 24.1                     | 224.1                           | 224.8 [M+H] <sup>+</sup>      |  | 13.1                   | 386.1                       | 386.8 [M+H] <sup>+</sup>                             | MONO                | A           |                             |
| 60              | 3-iodobenzoic acid                         | 0.6             | 3.2                | 18.7                     | 248.0                           | 249.0 [M+H] <sup>+</sup>      |  | 13.4                   | 410.0                       | 445.0 [M+Cl] <sup>+</sup>                            | MONO                |             |                             |
|                 |                                            |                 |                    |                          |                                 |                               |  | 13.6                   | 410.0                       | 445.0 [M+Cl] <sup>+</sup>                            | MONO                | A           |                             |
|                 |                                            |                 |                    |                          |                                 |                               |  | 13.9                   | 410.0                       | 445.0 [M+Cl] <sup>+</sup>                            | MONO                |             |                             |
|                 |                                            |                 |                    |                          |                                 |                               |  | 15.0                   | 410.0                       | 445.0 [M+Cl] <sup>+</sup>                            | MONO                |             |                             |
| 61              | sulfapyridine                              | 1               | 3                  | 15.4                     | 249.1                           | 250.1 [M+H] <sup>+</sup>      |  | 12.6                   | 411.1                       | 412.2 [M+H] <sup>+</sup>                             | MONO                | E           |                             |
| 62              | daunorubicin                               | 0.4             | 2.8                | 14.5                     | 527.2                           | 528.2 [M+H] <sup>+</sup>      |  | 11.1                   | 689.2                       | 690.2 [M+H] <sup>+</sup>                             | MONO                | A           |                             |
| 63              | trimethoprim                               | 2               | 2                  | 15.4                     | 290.1                           | 291.3 [M+H] <sup>+</sup>      |  | 13.3                   | 689.2                       | 690.2 [M+H] <sup>+</sup>                             | MONO                |             |                             |
|                 |                                            |                 |                    |                          |                                 |                               |  | 12.0                   | 452.2                       | 453.2 [M+H] <sup>+</sup>                             | MONO                | E           |                             |
| 64              | calicheamicin γ                            | 3               | 1                  | 15.6                     | 1367.3                          | 1402.2 [M+Cl] <sup>+</sup>    |  | 9.9                    | 1529.3                      | 1584.3 [M+Cl] <sup>+</sup>                           | MONO                | B           | 0.1 mM final concentration  |
| 65              | 3-chlorobenzoic acid                       | 0.1             | 1.8                | 17.2                     | 156.0                           | 157.0 [M+H] <sup>+</sup>      |  | 11.9                   | 318.1                       | 317.0 [M+H] <sup>+</sup>                             | MONO                |             |                             |
|                 |                                            |                 |                    |                          |                                 |                               |  | 12.4                   | 318.1                       | 317.0 [M+H] <sup>+</sup>                             | MONO                | A           |                             |
|                 |                                            |                 |                    |                          |                                 |                               |  | 12.8                   | 318.1                       | 317.0 [M+H] <sup>+</sup>                             | MONO                |             |                             |

| Compound Number | Compound Name             | WT % Conversion | 'ASP' % Conversion | substrate retention time | calculated substrate mass (m/z) | observed substrate mass (m/z) |  | product retention time | expected product mass (m/z) | observed product mass (m/z) | product designation | HPLC method | comments                    |
|-----------------|---------------------------|-----------------|--------------------|--------------------------|---------------------------------|-------------------------------|--|------------------------|-----------------------------|-----------------------------|---------------------|-------------|-----------------------------|
| 66              | ivermectin                | 0               | 2                  | 33.2                     | 874.5                           | 897.2 [M+Na] <sup>+</sup>     |  | 23.4                   | 1036.6                      | 1059.2 [M+Na] <sup>+</sup>  | MONO                | K           | 0.1 mM final concentration  |
| 67              | phenylacetic acid         | 0               | 2                  | 14.1                     | 136.1                           | 137.2 [M+H] <sup>+</sup>      |  | 9.9                    | 298.1                       | 333.2 [M+Cl] <sup>-</sup>   | MONO                | A           |                             |
| 68              | 2-benzoylbenzoic acid     | 1               | 1                  | 18.2                     | 226.1                           | 227.2 [M+H] <sup>+</sup>      |  | 13.2                   | 388.1                       | 411.2 [M+Na] <sup>+</sup>   | MONO                | A           |                             |
|                 |                           |                 |                    |                          |                                 |                               |  | 13.4                   | 388.1                       | 411.0 [M+Na] <sup>+</sup>   | MONO                |             |                             |
|                 |                           |                 |                    |                          |                                 |                               |  | 13.6                   | 388.1                       | 411.0 [M+Na] <sup>+</sup>   | MONO                |             |                             |
|                 |                           |                 |                    |                          |                                 |                               |  | 13.7                   | 388.1                       | 411.2 [M+Na] <sup>+</sup>   | MONO                |             |                             |
|                 |                           |                 |                    |                          |                                 |                               |  | 13.9                   | 388.1                       | 411.2 [M+Na] <sup>+</sup>   | MONO                |             |                             |
| 69              | chloramphenicol           | 1               | 1                  | 14.4                     | 322.0                           | 321.0 [M-H] <sup>-</sup>      |  | 12.4                   | 484.1                       | 483.0 [M-H] <sup>-</sup>    | MONO                | A           |                             |
| 70              | staurosporine glucoside   | 0               | 1                  | 14.6                     | 473.2                           | 472.2 [M-H] <sup>-</sup>      |  | 7.6                    | 635.2                       | 670.0 [M+Cl] <sup>-</sup>   | MONO                | A           | 0.05 mM final concentration |
| 71              | avermectin                | 0               | 1                  | 26.3                     | 872.5                           | 895.2 [M+Na] <sup>+</sup>     |  | 18.2                   | 1034.5                      | 1058.0 [M+Na] <sup>+</sup>  | MONO                | K           | 0.1 mM final concentration  |
| 72              | indole                    | 0               | 0.4                | 18.4                     | 117.1                           | 118.2 [M+H] <sup>+</sup>      |  | 10.6                   | 279.1                       | 280.0 [M+H] <sup>+</sup>    | MONO                | A           |                             |
| 73              | ivermectin pseudo-aglycon | 0               | 0.2                | 27.8                     | 730.4                           | 753.0 [M+Na] <sup>+</sup>     |  | 18.65                  | 892.5                       | 915.6 [M+Na] <sup>+</sup>   | MONO                | K           | 0.01 mM final concentration |

[a] % conversion is calculated as the sum of all observed products; [b] MONO – mass corresponds to monosaccharide product, DI – mass corresponds to disaccharide product; [c] refer to Supp. Info. 8.2 for HPLC methods; [d] n.f. – not found

## 8.2. HPLC methods.

| Method   | Solvent A <sup>[a]</sup>                        | Solvent B          | Gradient                                                          | Detection (nm) |
|----------|-------------------------------------------------|--------------------|-------------------------------------------------------------------|----------------|
| <b>A</b> | 0.01% TFA                                       | CH <sub>3</sub> CN | 10-75% B, 20 min; 75-100% B, 1min; 100% B, 5 min                  | 254            |
| <b>B</b> | 0.01% TFA                                       | CH <sub>3</sub> CN | 10-100% B, 20 min                                                 | 280            |
| <b>C</b> | 50 mM Tris, pH 8.0                              | CH <sub>3</sub> CN | 5% B, 2.5 min; 5-60% B, 18.5 min; 60-100% B, 1 min; 100% B, 6 min | 254            |
| <b>D</b> | ddH <sub>2</sub> O                              | CH <sub>3</sub> CN | 10-75% B, 20 min; 75-100% B, 1min; 100% B, 14 min                 | 254            |
| <b>E</b> | ddH <sub>2</sub> O                              | CH <sub>3</sub> CN | 2% B, 2.5 min; 2-60% B, 17.5 min; 60-100% B, 1 min; 100% B, 4 min | 254            |
| <b>F</b> | 0.01% TFA                                       | CH <sub>3</sub> CN | 10-75% B, 20 min; 75-100% B, 1min; 100% B, 5 min                  | 305            |
| <b>G</b> | 10 mM NH <sub>4</sub> CO <sub>3</sub> , pH 10.0 | CH <sub>3</sub> CN | 10-75% B, 20 min; 75-100% B, 1min; 100% B, 5 min                  | 254            |
| <b>H</b> | ddH <sub>2</sub> O                              | CH <sub>3</sub> CN | 10-75% B, 20 min; 75-100% B, 1min; 100% B, 5 min                  | 254            |
| <b>J</b> | ddH <sub>2</sub> O                              | CH <sub>3</sub> CN | 5% B, 5 min; 5-75% B, 15 min; 75-100% B, 1 min; 100% B, 5 min     | 254            |
| <b>K</b> | ddH <sub>2</sub> O                              | CH <sub>3</sub> CN | 30-70% B, 5 min; 70-100% B, 30 min; 100% B, 3 min                 | 243            |
| <b>L</b> | 0.01% TFA                                       | CH <sub>3</sub> CN | 10-100% B, 15 min; 100% B, 20 min                                 | 254            |
| <b>M</b> | 0.01% TFA                                       | CH <sub>3</sub> CN | 10-75% B, 20 min; 75-100% B, 1min; 100% B, 5 min                  | 320            |

[a] 0.1% formic acid in ddH<sub>2</sub>O was utilized for LC/ESI-MS methods when solvent A was ddH<sub>2</sub>O or 0.1% trifluoroacetic acid in ddH<sub>2</sub>O. 5 mM ammonium bicarbonate (pH 8.0) was utilized for LC/ESI-MS methods when solvent A was 50 mM Tris-HCl [pH 8.0] in ddH<sub>2</sub>O or 10 mM ammonium bicarbonate (pH 10.0) in ddH<sub>2</sub>O.

### 8.3 Representative HPLC traces.

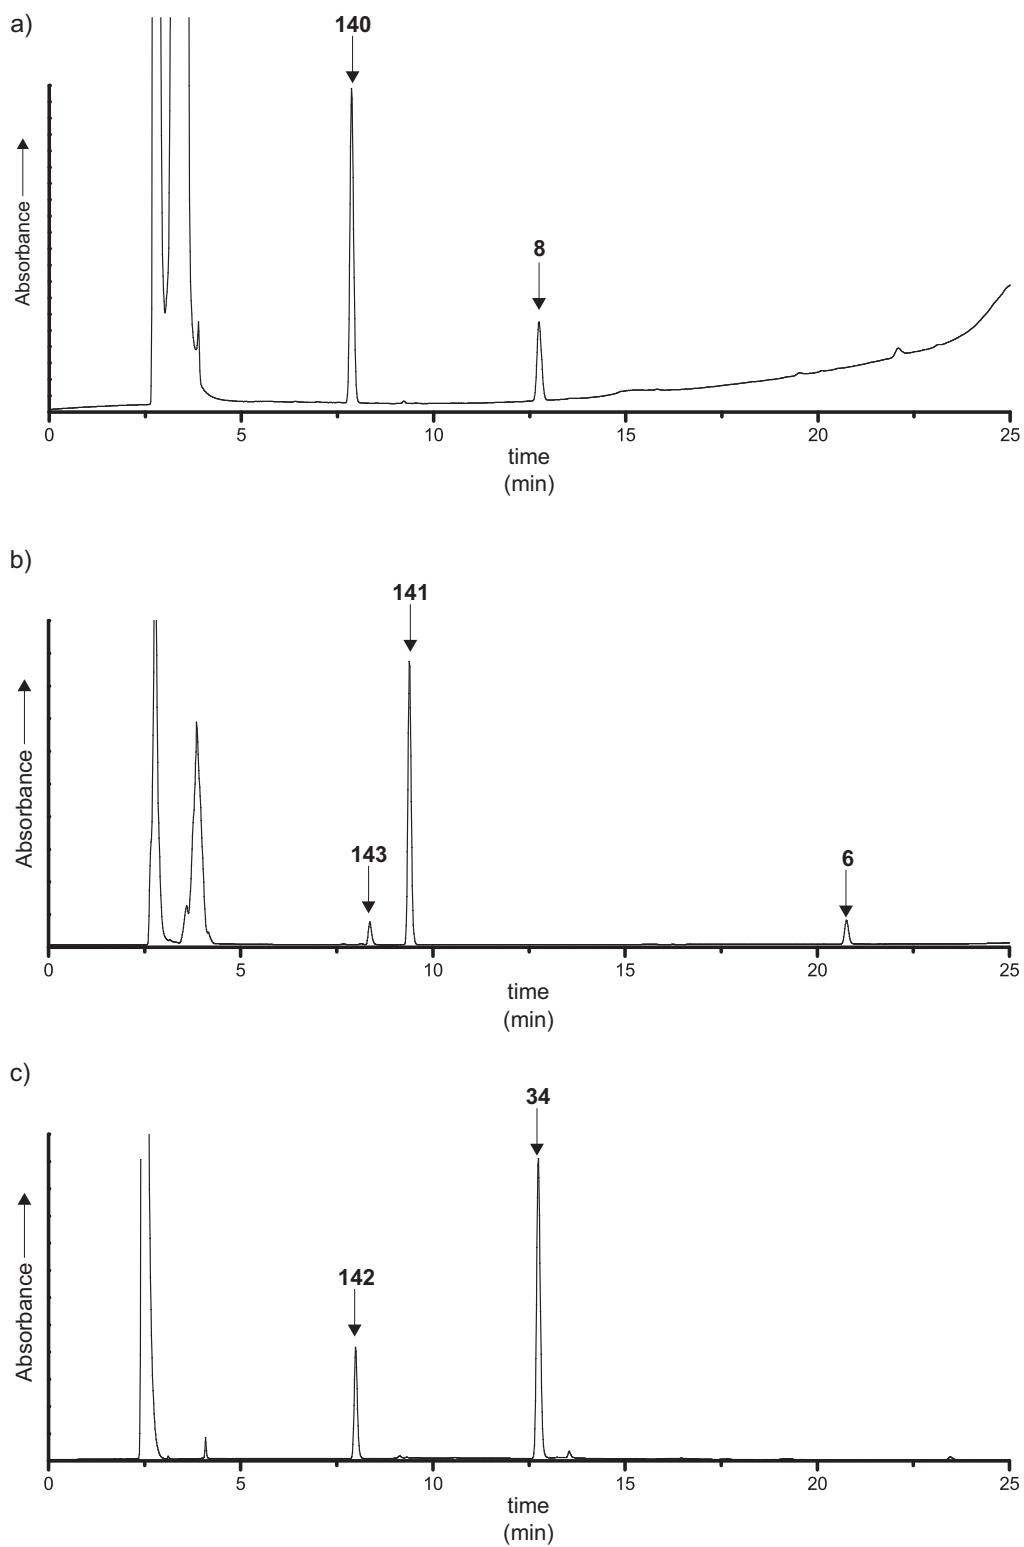

**Supplementary Figure 3.** Representative HPLC traces for OleD reactions with **a)** phenol (**8**), **b)** thiophenol (**6**), and **c)** aniline (**34**).

## 9. Structures of aglycon library members.

**Supplementary Figure 4.** Compounds that resulted in observable glucosylation (**3-73**) are listed in descending order of observed 'ASP' conversion. Compounds with no observable glucosylation (**74-139**) are listed in alphabetical order. *Italic numbers noted under compound number and name denote observed percent conversion for WT/ASP.*

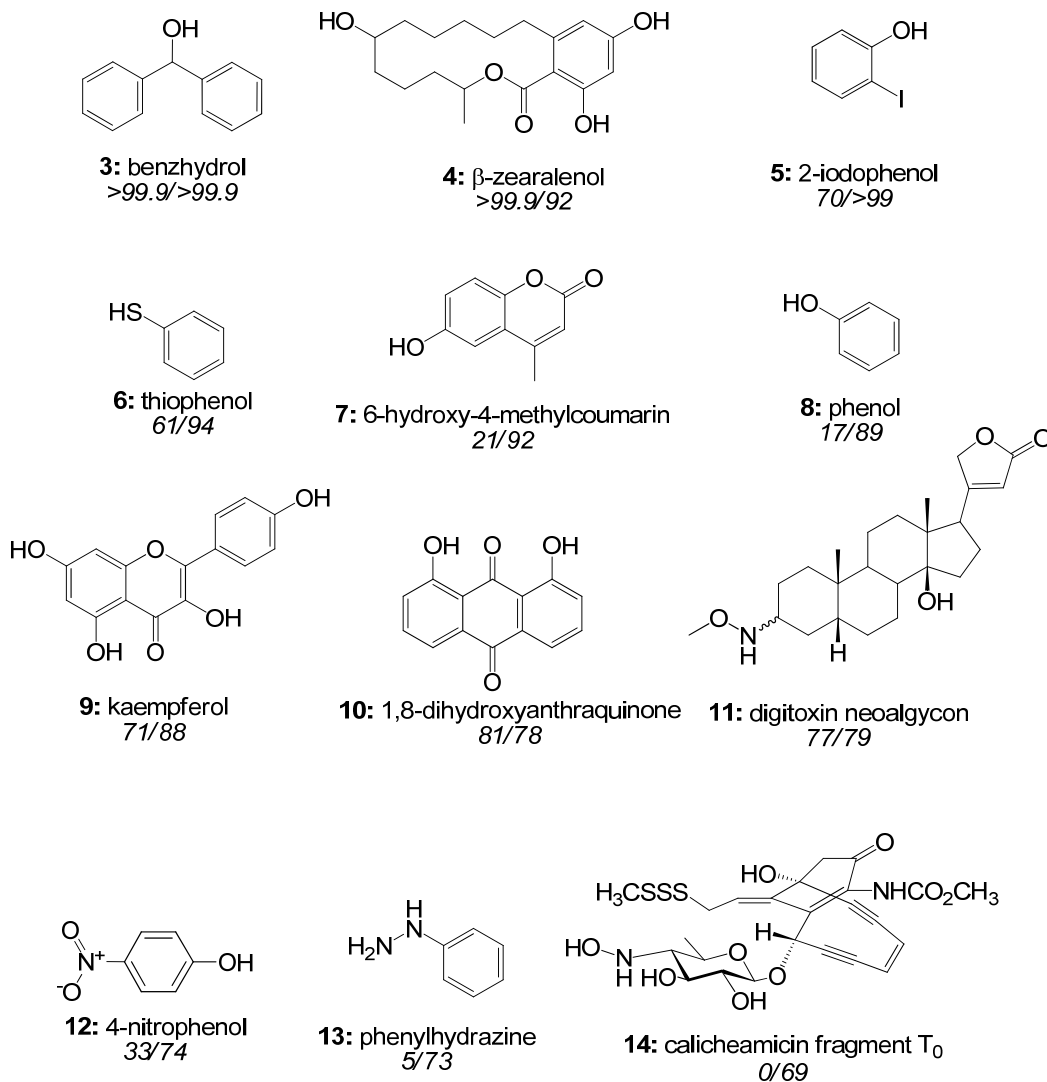

Structures of All Library members (con't)

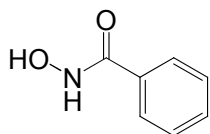

**15:** N-hydroxybenzamide  
(benzohydroxamic acid)  
25/66

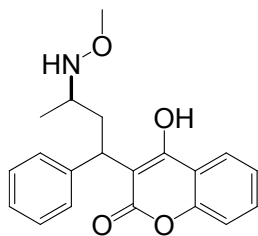

**16:** warfarin neoglycon  
6/65

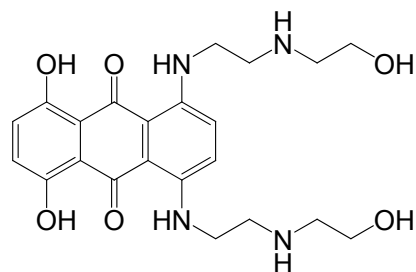

**17:** mitoxantrone  
11/63

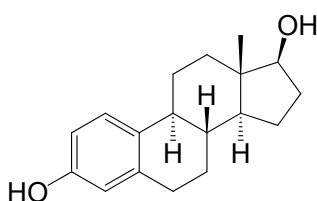

**18:** beta-estradiol  
0/60

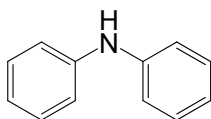

**19:** diphenylamine  
51/49

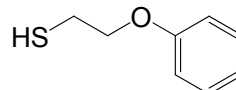

**20:** phenoxyethanethiol  
32/49

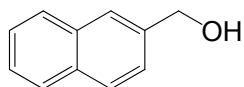

**21:** 2-naphthalenemethanol  
80/46

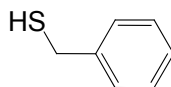

**22:** benzylmercaptan  
37/45

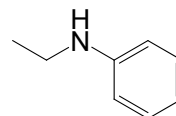

**23:** N-ethylaniline  
10/41

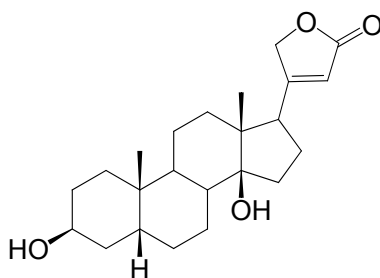

**24:** digitoxigenin  
9/40

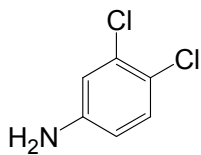

**25:** 3,4-dichloroaniline  
9/39

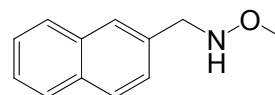

**26:** N-methoxy-2-  
naphthalenemethanamine  
64/38

Structures of All Library members (con't)

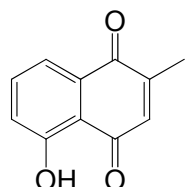

**27:** plumbagin  
11/35

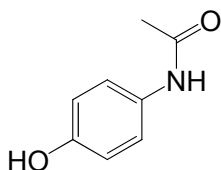

**28:** acetaminophen  
3/35

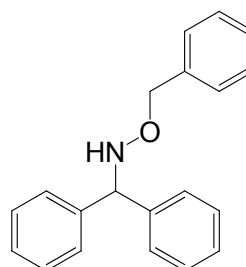

**29:** N-benzyloxybenzhydramine  
87/32

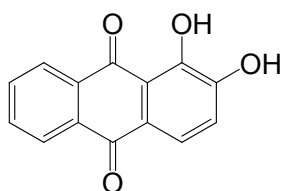

**30:** alizarin  
27/31

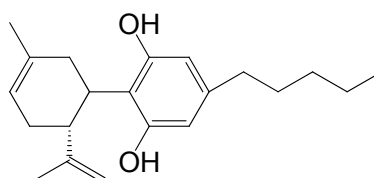

**31:** cannabidiol  
49/29

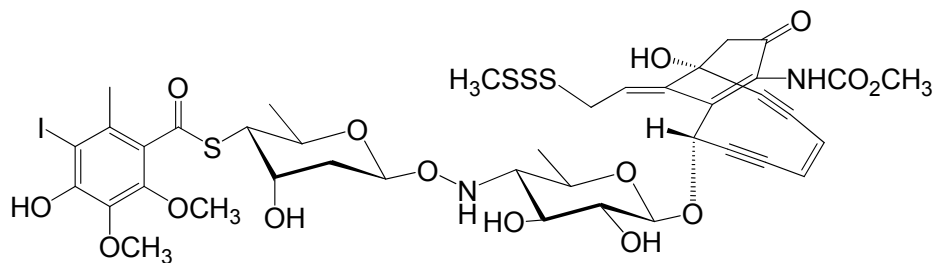

**32:** calicheamicin fragment pseudo-aglycon  
43/27

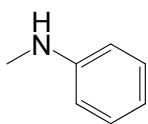

**33:** N-methylaniline  
4/27

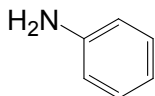

**34:** aniline  
3/27

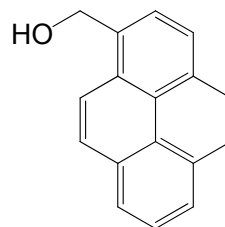

**35:** 1-pyrenemethanol  
3/27

Structures of All Library members (con't)

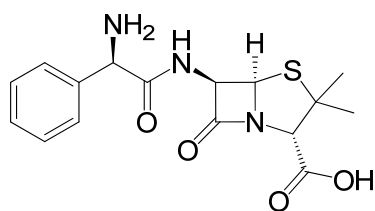

**36: ampicillin**  
3/27

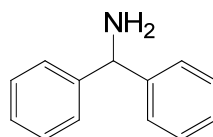

**37: benzhydrylamine**  
(aminodiphenylmethane)  
34/27

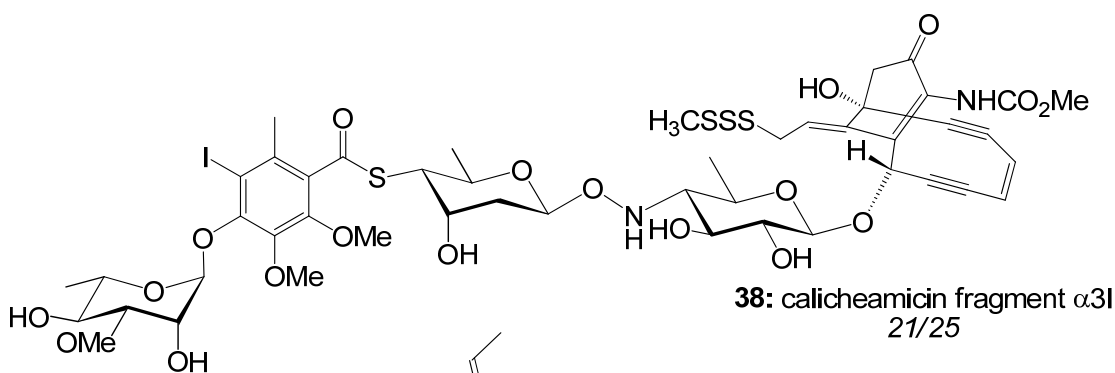

**38: calicheamicin fragment  $\alpha$ 3I**  
21/25

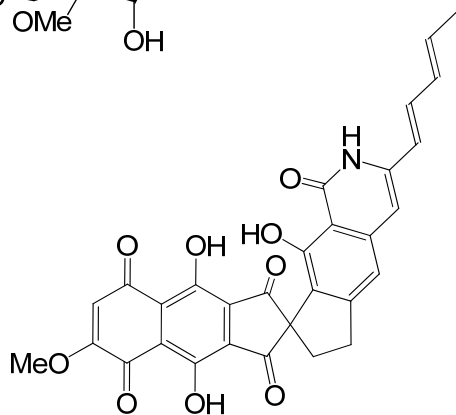

**39: fredericamycin A**  
17/25

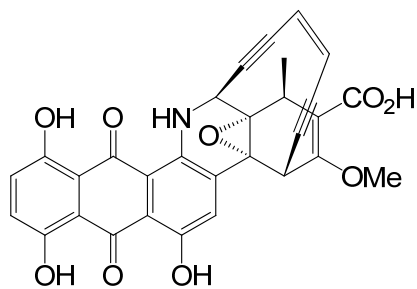

**40: dynemicin A**  
24/25

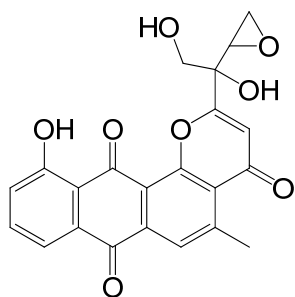

**41: hydramycin**  
7/24

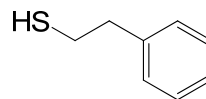

**42: 2-phenylethanethiol**  
31/23



Structures of All Library members (con't)

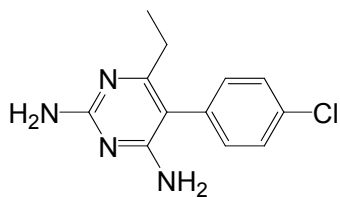

**43:** pyrimethamine  
36/21

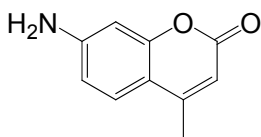

**44:** 7-amino-4-methylcoumarin  
1/18

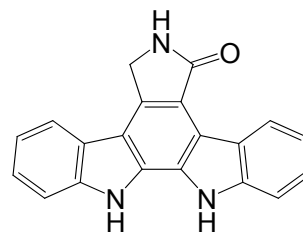

**45:** staurosporine aglycon  
5/15

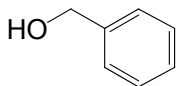

**46:** benzylalcohol  
8/14

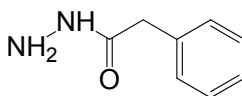

**47:** phenylacetic hydrazide  
0/13

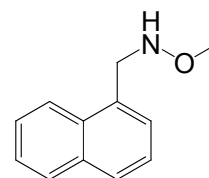

**48:** N-methoxy-1-naphthalenemethanamine  
18/11

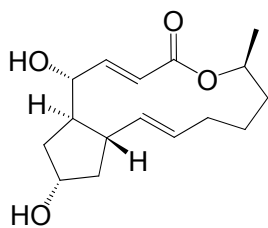

**49:** brefeldin A  
1/10

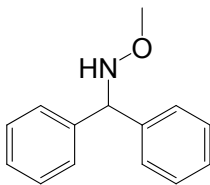

**50:** N-methoxybenzhydramine  
9/2

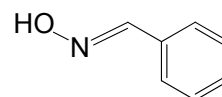

**51:** benzaldehyde oxime  
3/9

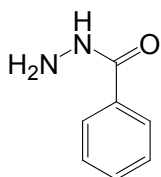

**52:** benzoic hydrazide  
3/7

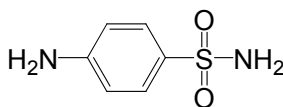

**53:** sulfanilamide  
0/7

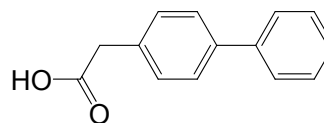

**54:** 4-biphenylacetic acid  
1/6

Structures of All Library members (con't)

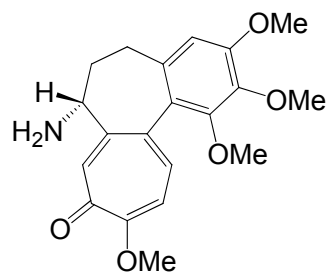

**55: deacetyl-colchicine**  
21/3

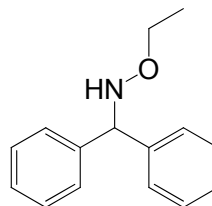

**56: N-ethoxydiphenylmethanamine**  
41/10

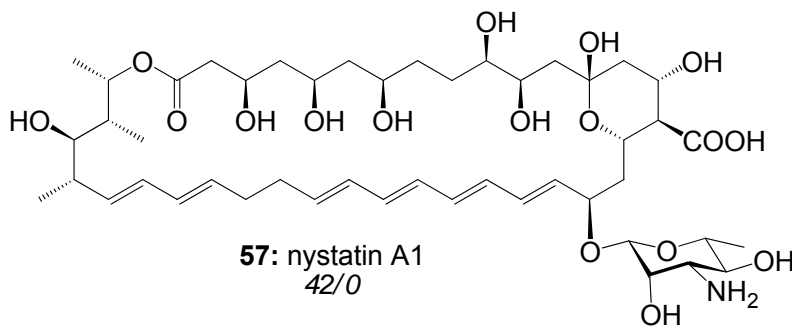

**57: nystatin A1**  
42/0

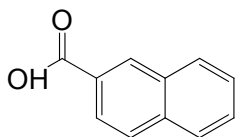

**58: 2-naphthoic acid**  
0.2/5

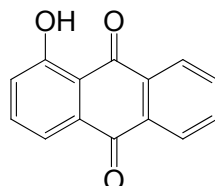

**59: 1-hydroxyanthraquinone**  
3/4

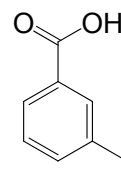

**60: 3-iodobenzoic acid**  
1/3

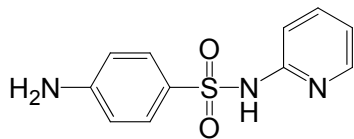

**61: sulfapyridine**  
1/3

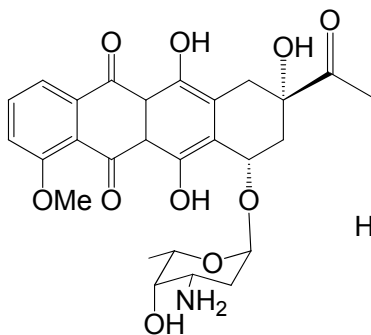

**62: daunorubicin**  
0/3

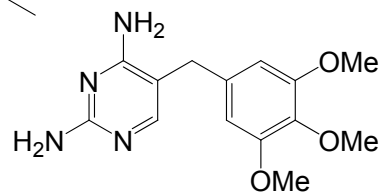

**63: trimethoprim**  
2/2

Structures of All Library members (con't)

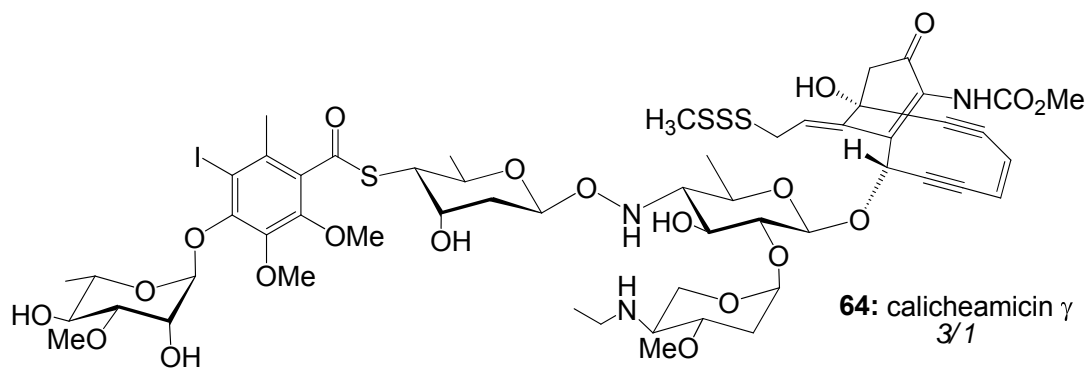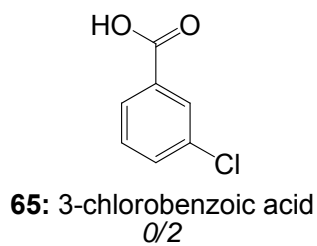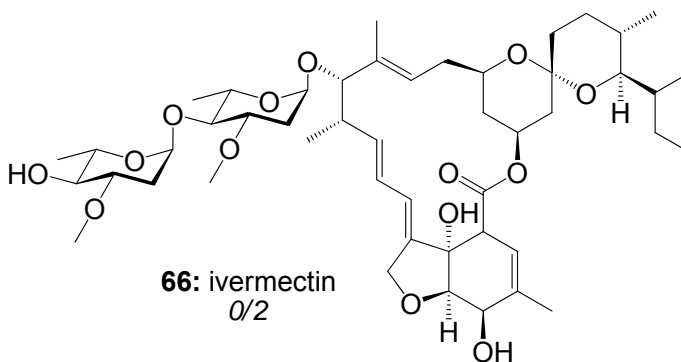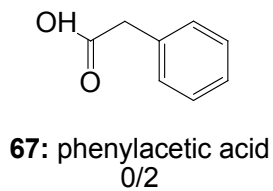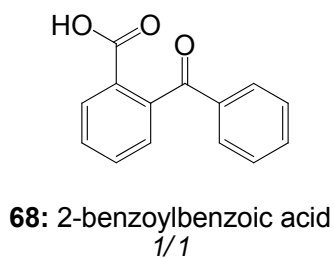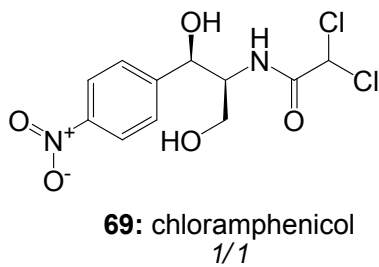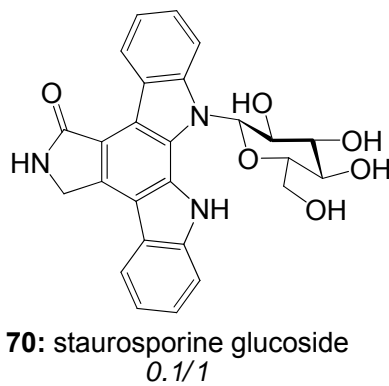

Structures of All Library members (con't)

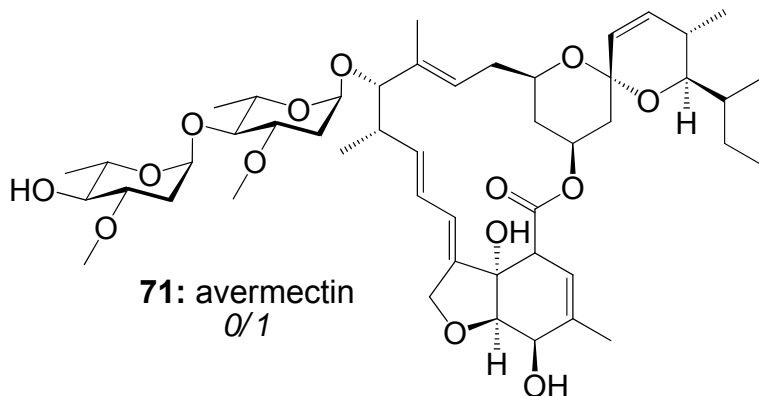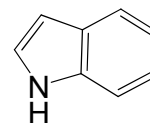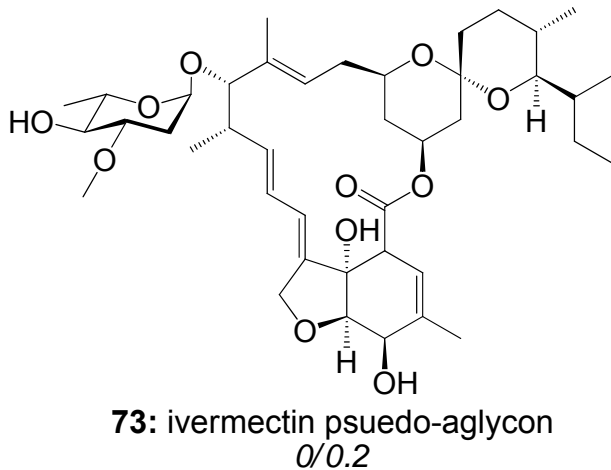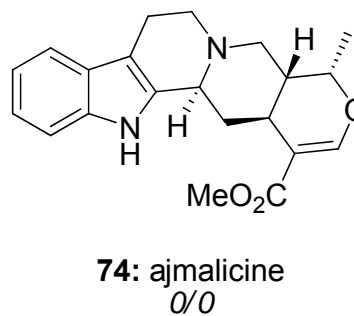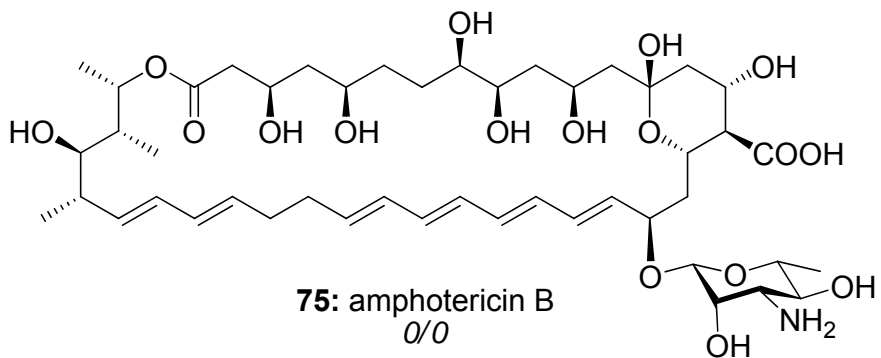

Structures of All Library members (con't)

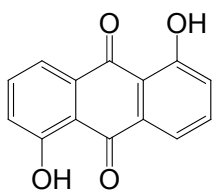

**76: anthrurufin**  
0/0

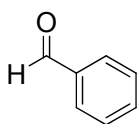

**77: benzaldehyde**  
0/0

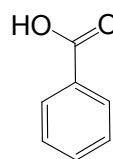

**78: benzoic acid**  
0/0

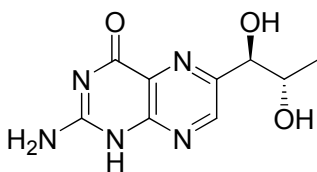

**79: 6-biopterin**  
0/0

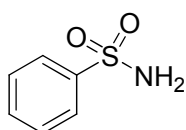

**80: benzenesulfonamide**  
0/0

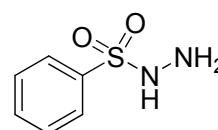

**81: benzenesulfonyl hydrazide**  
0/0

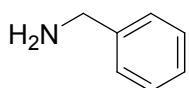

**82: benzylamine**  
0/0

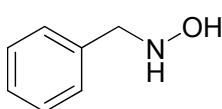

**83: O-benzylhydroxylamine**  
0/0

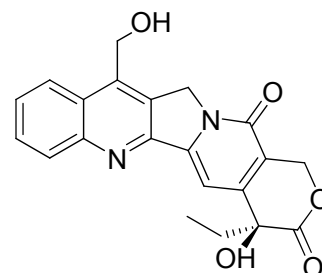

**84: camptothecin**  
0/0

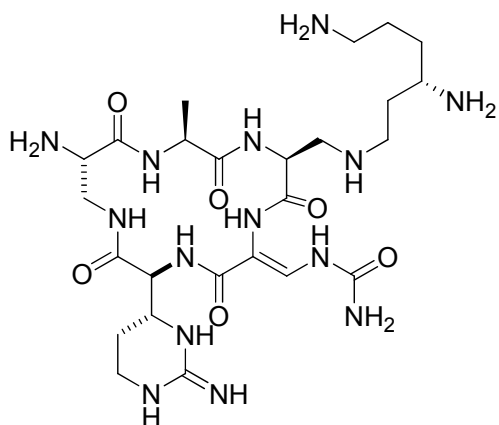

**85: capreomycin 1B**  
0/0

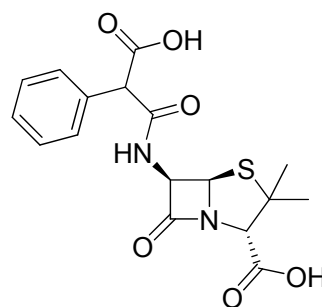

**86: carbenicillin**  
0/0

Structures of All Library members (con't)

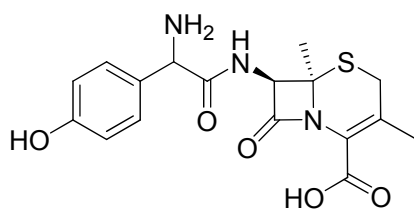

**87: cefadroxil**  
0/0

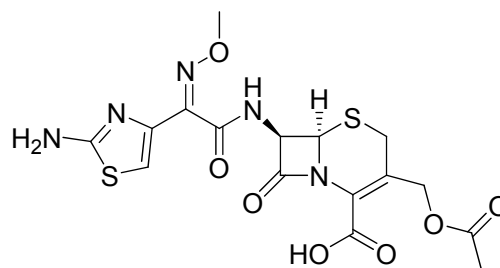

**88: cefotaxime**  
0/0

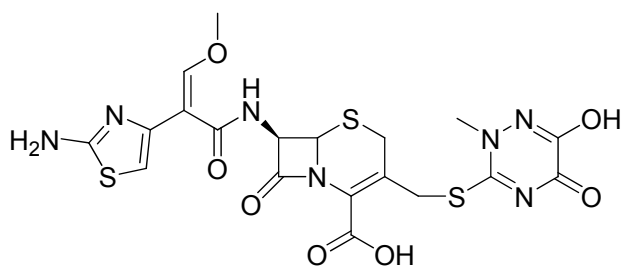

**89: ceftriaxone**  
0/0

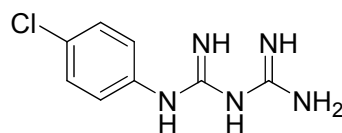

**90: 1-(4-chlorophenyl)biguanide**  
0/0

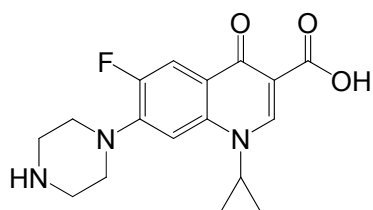

**91: ciprofloxacin**  
0/0

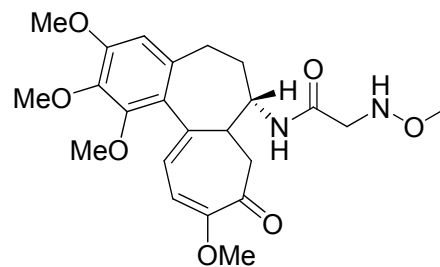

**92: colchicine neoaglycon**  
0/0

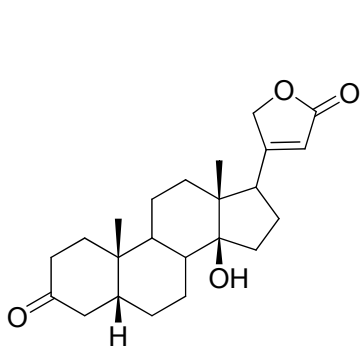

**93: digitoxone**  
0/0

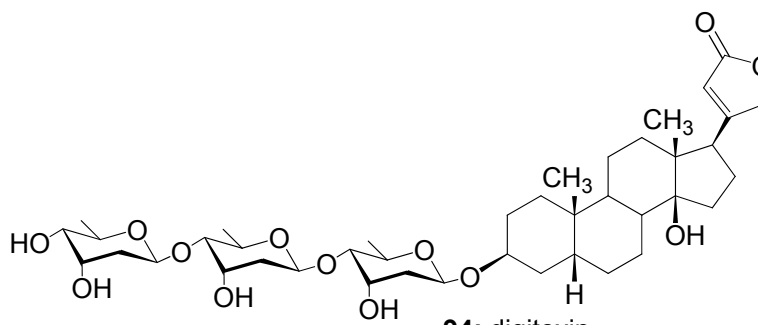

**94: digitoxin  
(digoxin)**  
0/0

Structures of All Library members (con't)

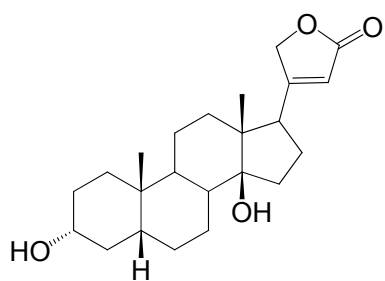

**95:** epi-digitoxigenin  
0/0

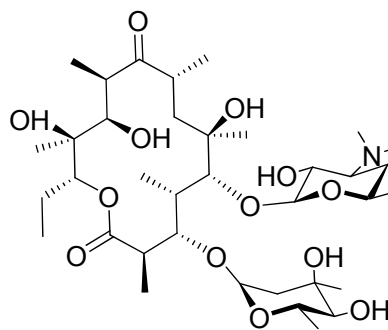

**96:** erythromycin  
0/0

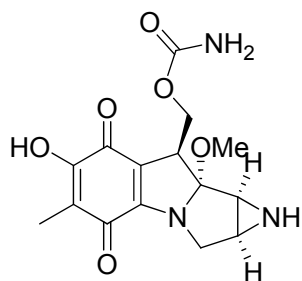

**97:** hydroxymitomycin C  
0/0

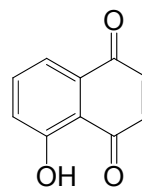

**98:** 5-hydroxy-1,4-naphthaquinone  
0/0

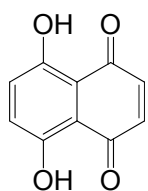

**99:** 5,8-dihydroxy-1,4-naphthaquinone  
0/0

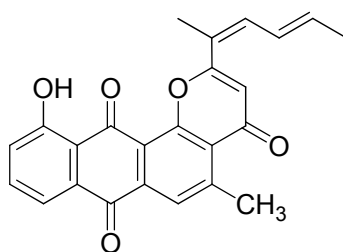

**100:**  $\alpha$ -indomycinone  
0/0

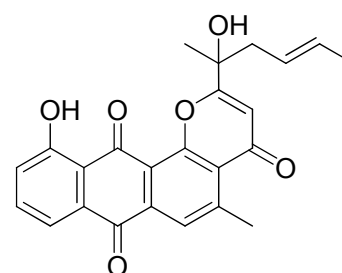

**101:**  $\beta$ -indomycinone  
0/0

Structures of All Library members (con't)

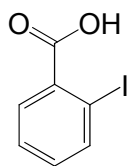

**102:** 2-iodobenzoic acid  
0/0

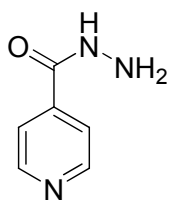

**103:** isoniazid  
0/0

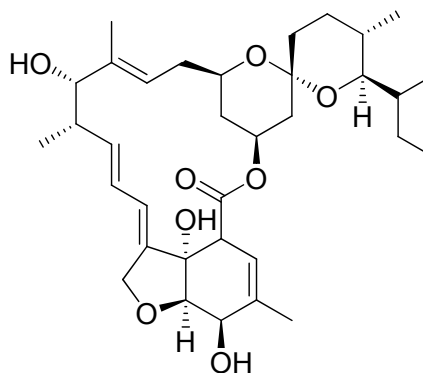

**104:** ivermectin aglycon  
0/0

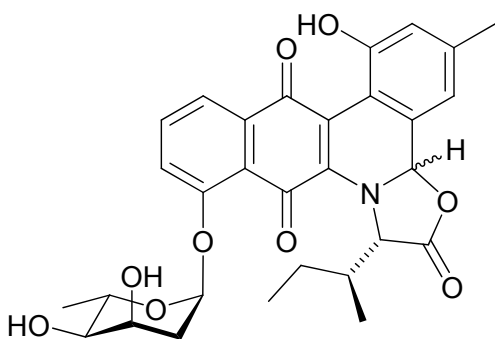

**105:** jadomycin B  
0/0

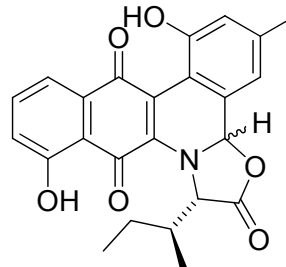

**106:** jadomycin B aglycone  
0/0

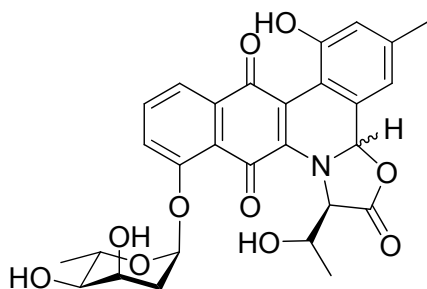

**107:** jadomycin DT

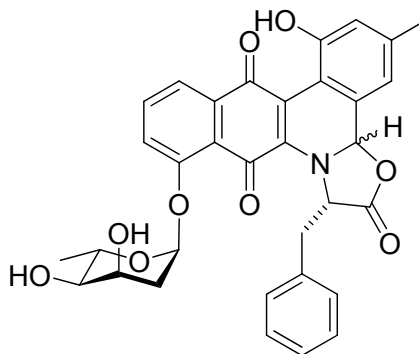

**108:** jadomycin F



Structures of All Library members (con't)

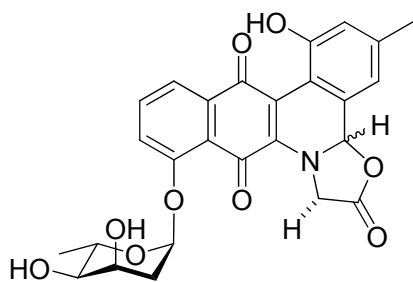

109: jadomycin G

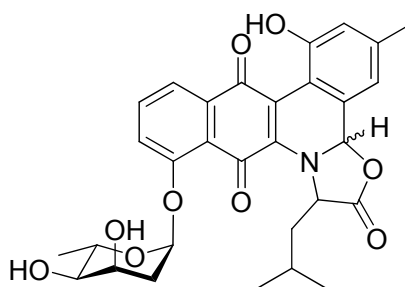

110: jadomycin L

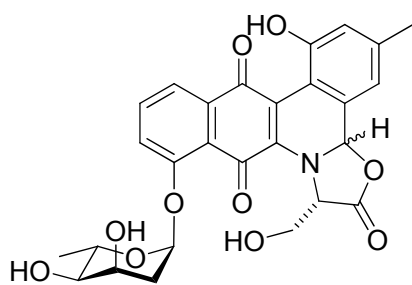

111: jadomycin S

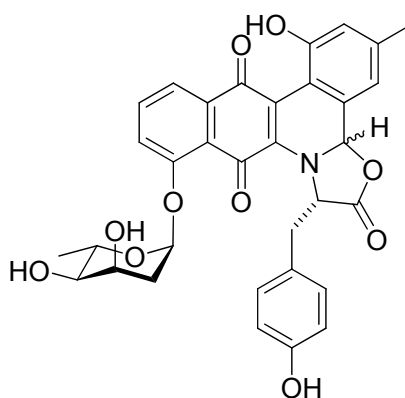

112: jadomycin Y

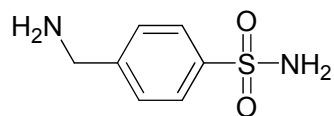

113: mafenide  
0/0

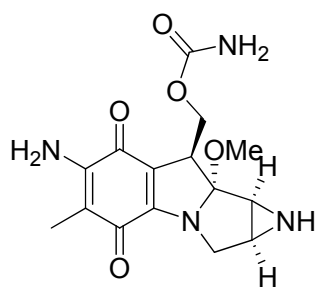

114: mitomycin C  
0/0

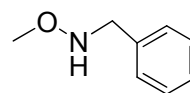

115: N-methoxybenzylamine  
0/0

Structures of All Library members (con't)

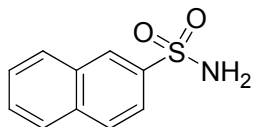

**116:** naphthalene-2-sulfonamide  
0/0

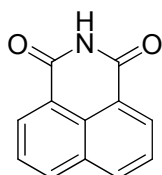

**117:** 1,8-naphthalimide  
0/0

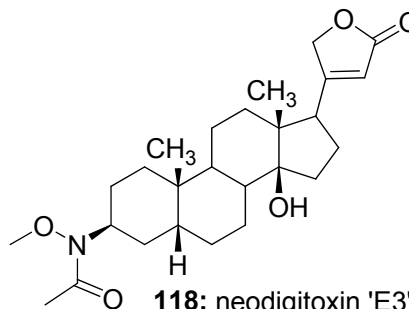

**118:** neodigitoxin 'E3'  
0/0

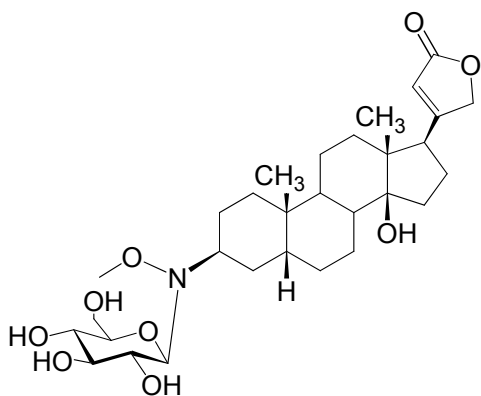

**119:** neodigitoxin glucoside  
0/0

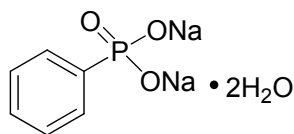

**120:** sodium phenyl phosphate  
dibasic dihydrate  
0/0

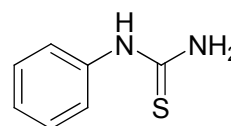

**121:** N-phenylthiourea  
0/0

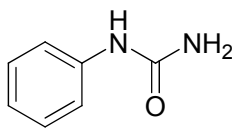

**122:** N-phenylurea  
0/0

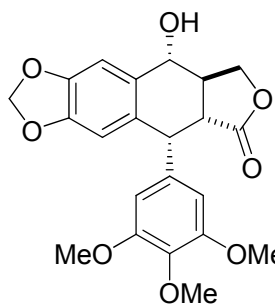

**123:** podophyllotoxin  
0/0

Structures of All Library members (con't)

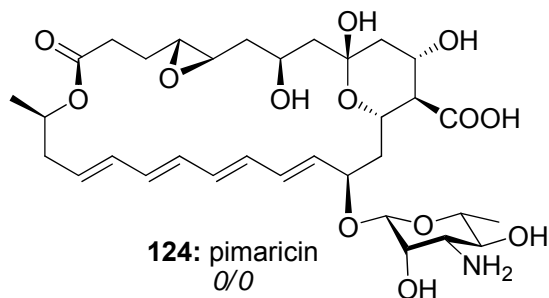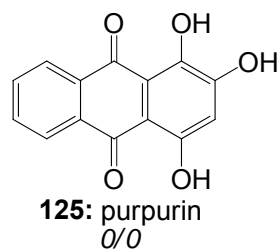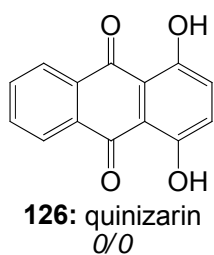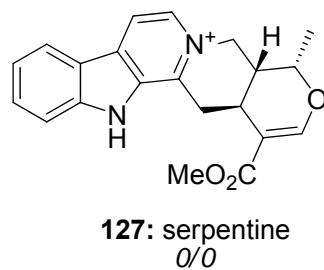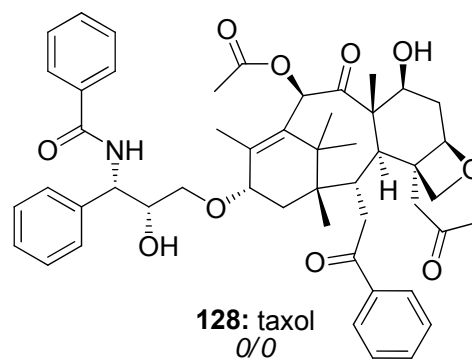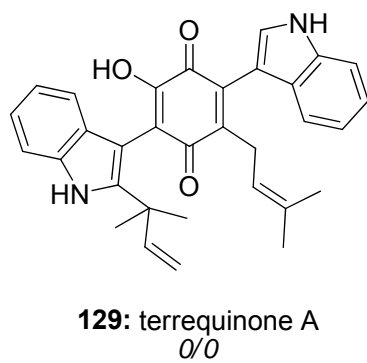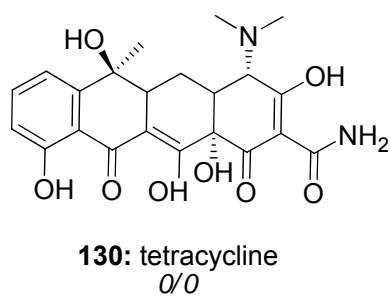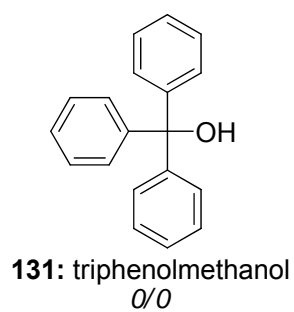

Structures of All Library members (con't)

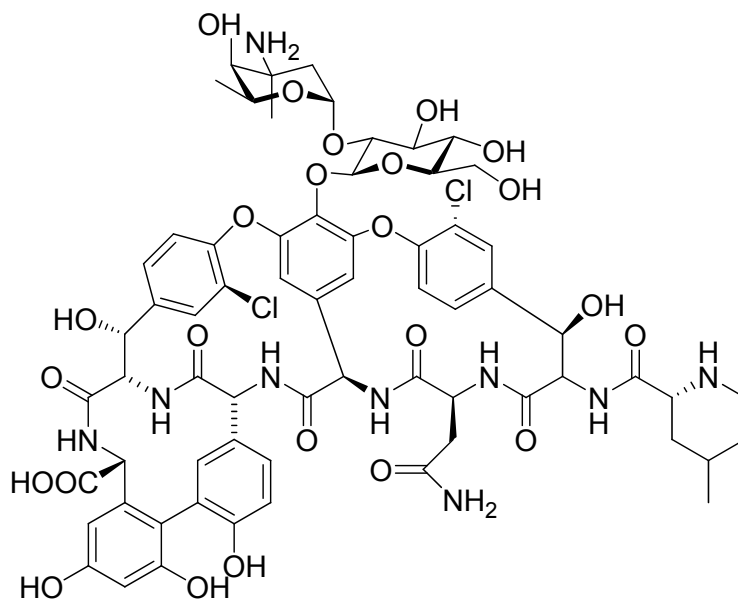

**132:** vancomycin  
0/0

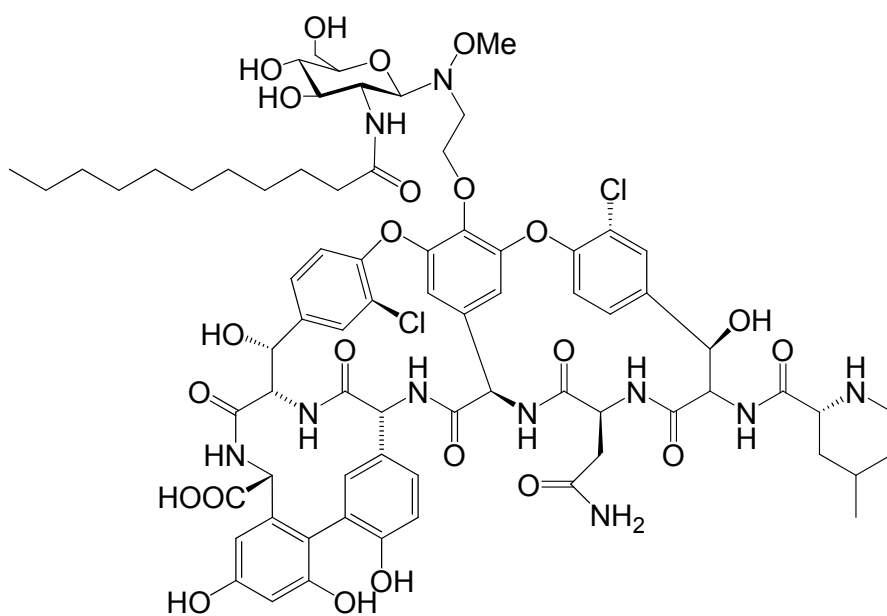

**133:** vancomycin 1-1  
0/0

Structures of All Library members (con't)

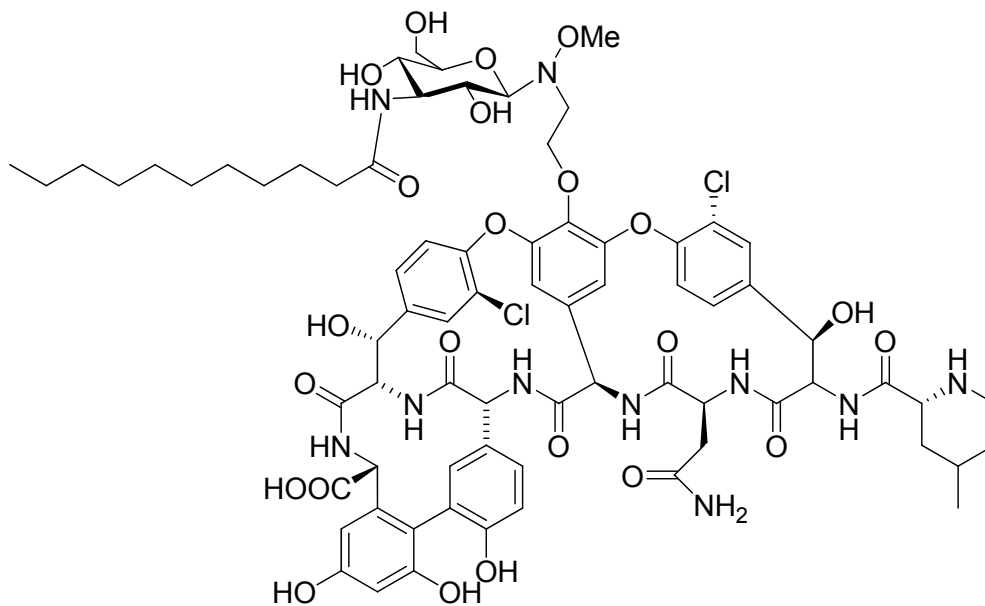

**134: vancomycin 1-2**  
0/0

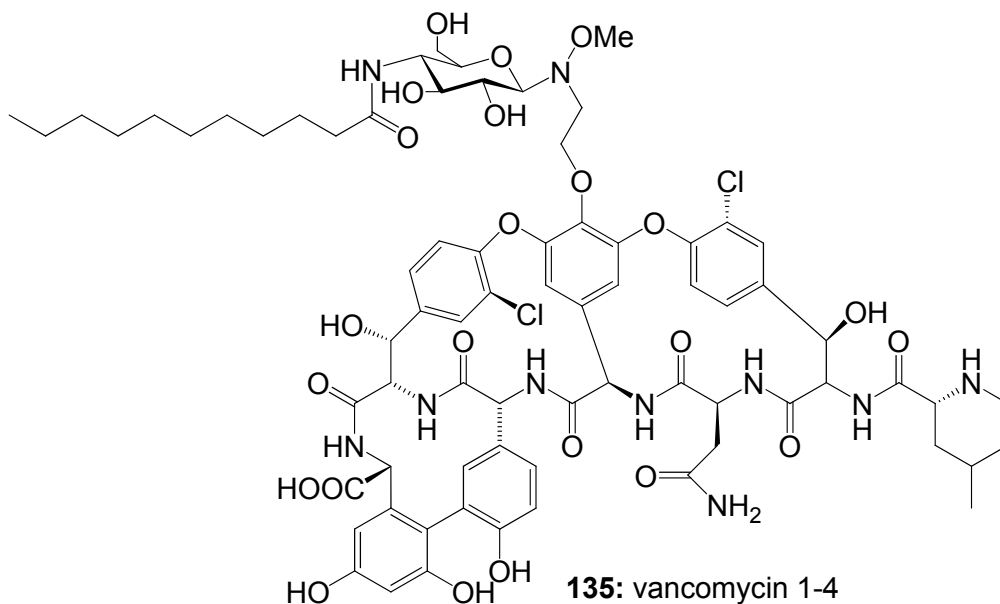

**135: vancomycin 1-4**  
0/0

Structures of All Library members (con't)

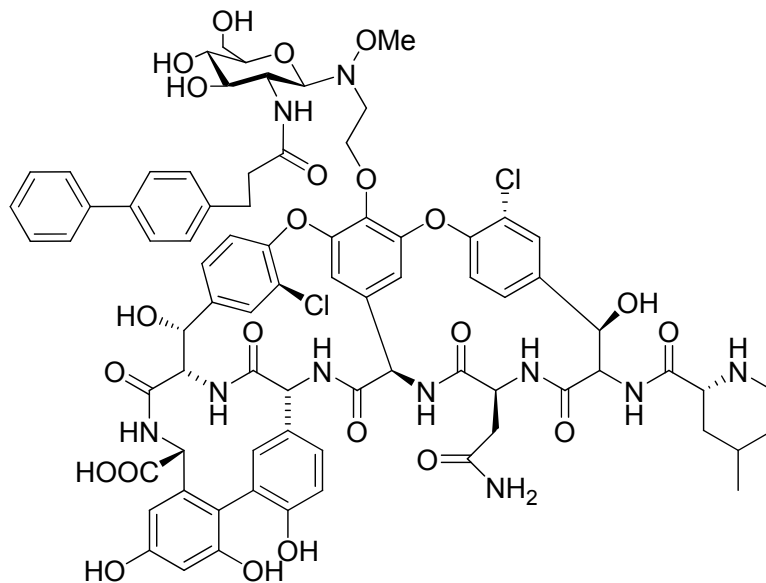

**134:** vancomycin 1-5  
0/0

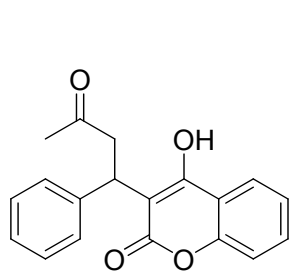

**135:** warfarin  
0/0

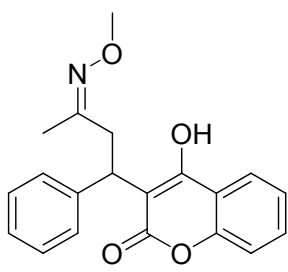

**136:** warfarin oxime  
0/0

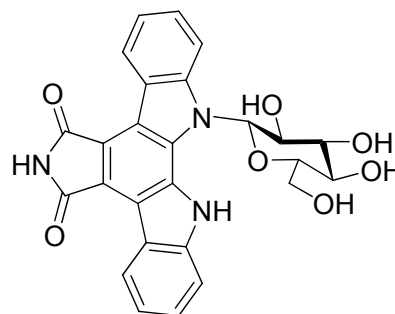

**137:** '131'  
0/0

## 10. $^1\text{H}$ and $^{13}\text{C}$ NMR Spectra.

$^1\text{H}$ , 400 MHz,  $\text{CDCl}_3$

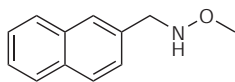

26

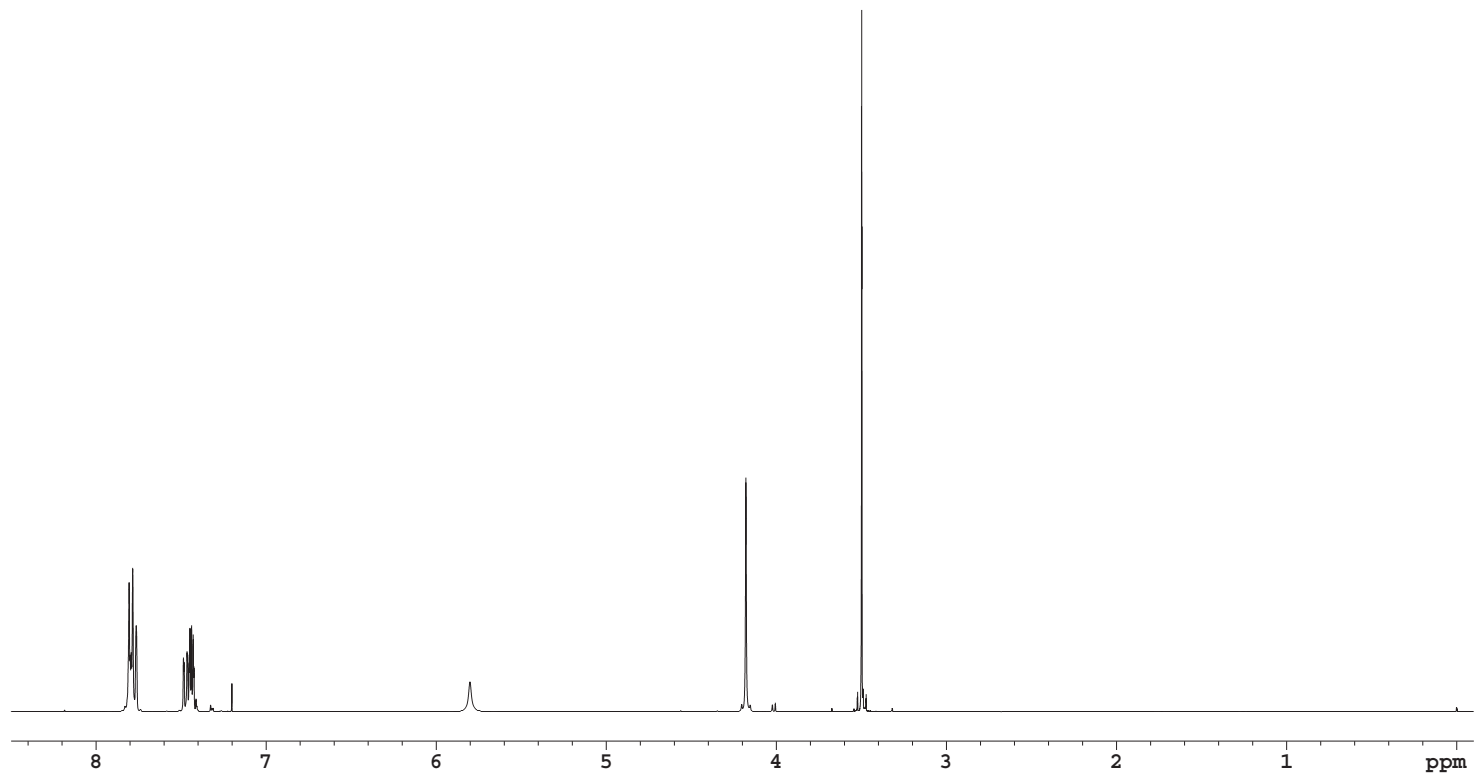

$^{13}\text{C}$ , 100 MHz,  $\text{CDCl}_3$

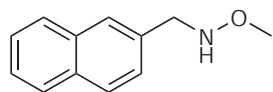

26

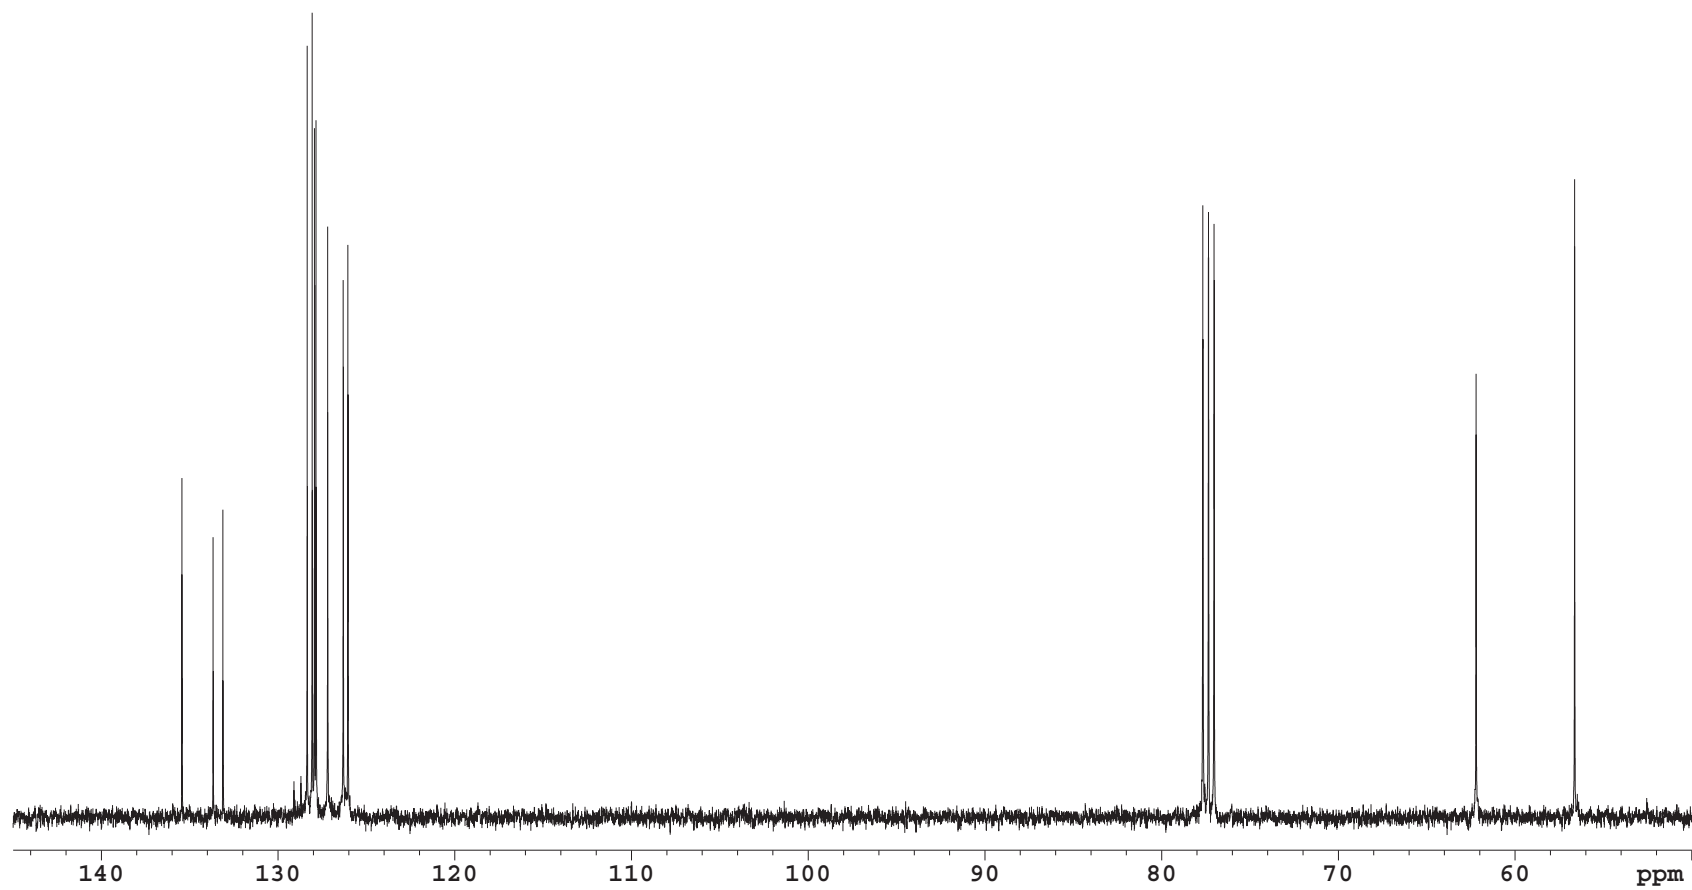



$^1\text{H}$ , 400 MHz,  $\text{CDCl}_3$

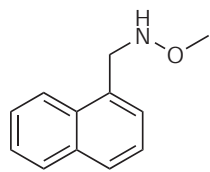

48

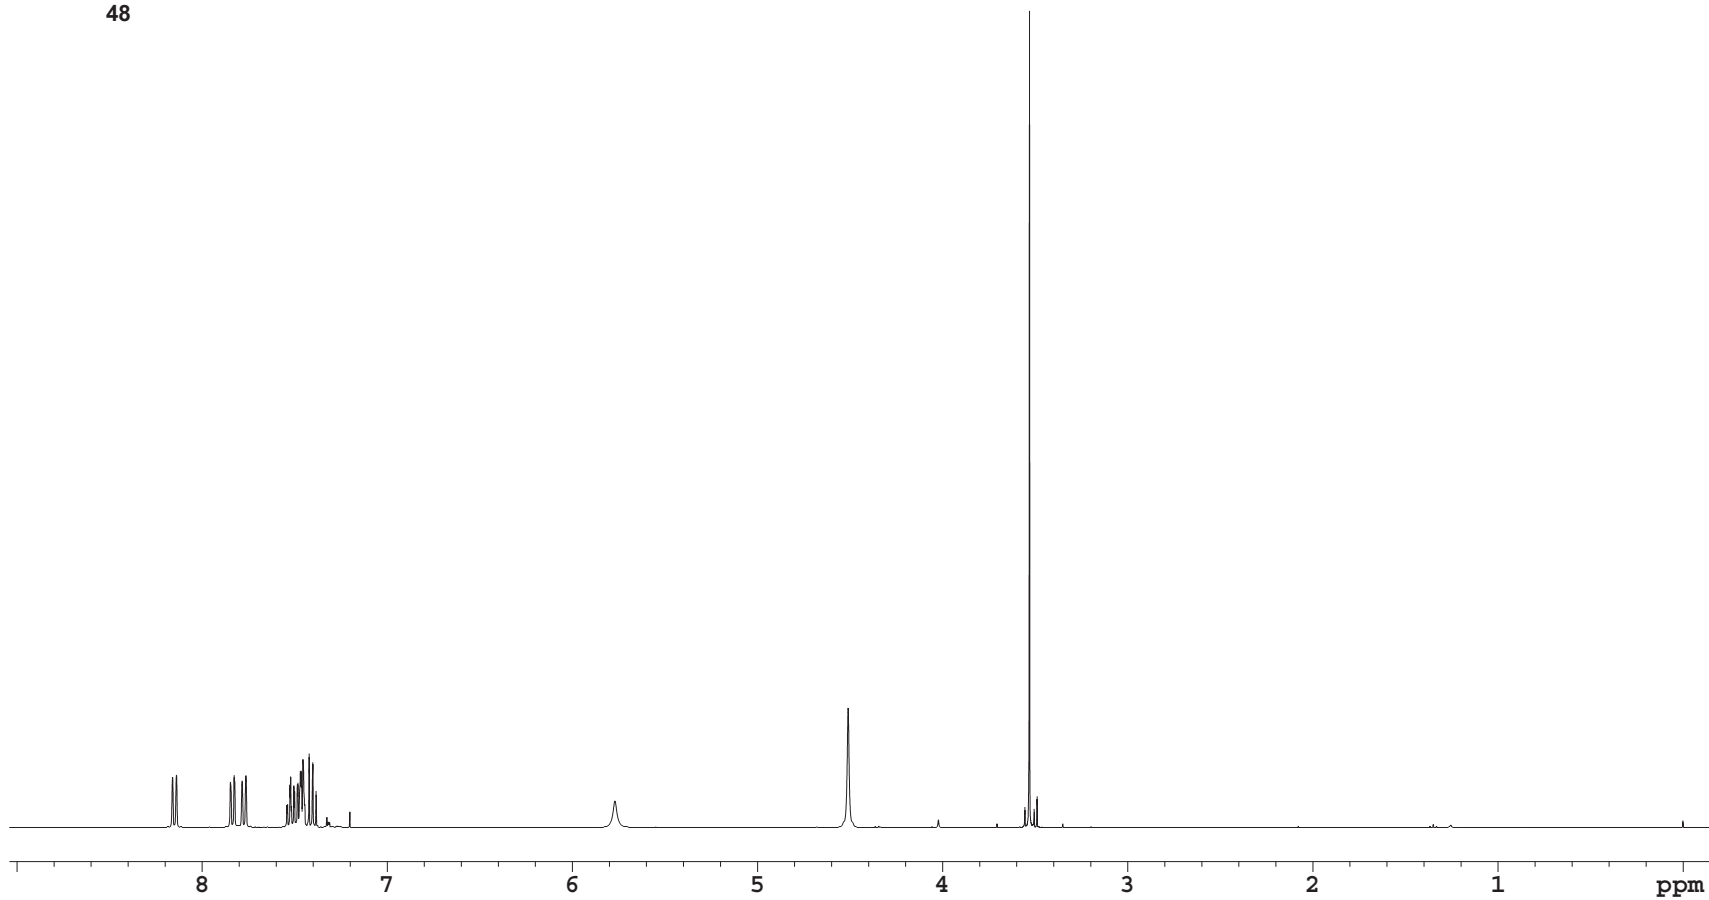

$^{13}\text{C}$ , 100 MHz,  $\text{CDCl}_3$

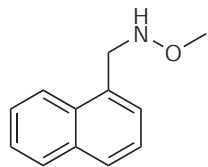

48

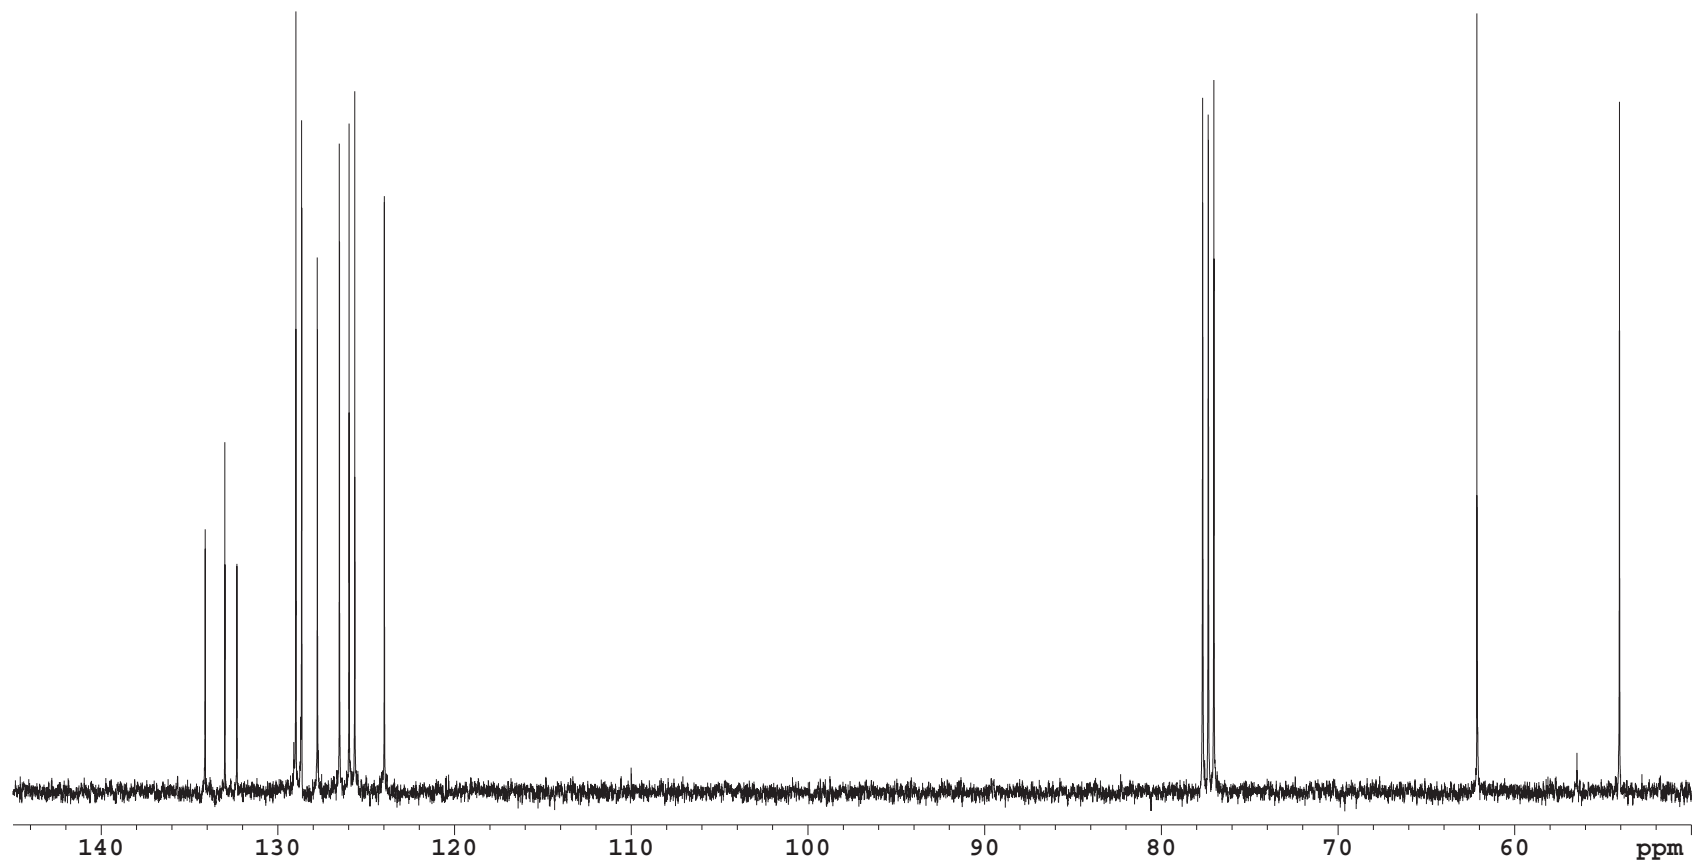

$^1\text{H}$ , 400 MHz,  $\text{CDCl}_3$

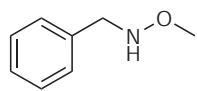

115

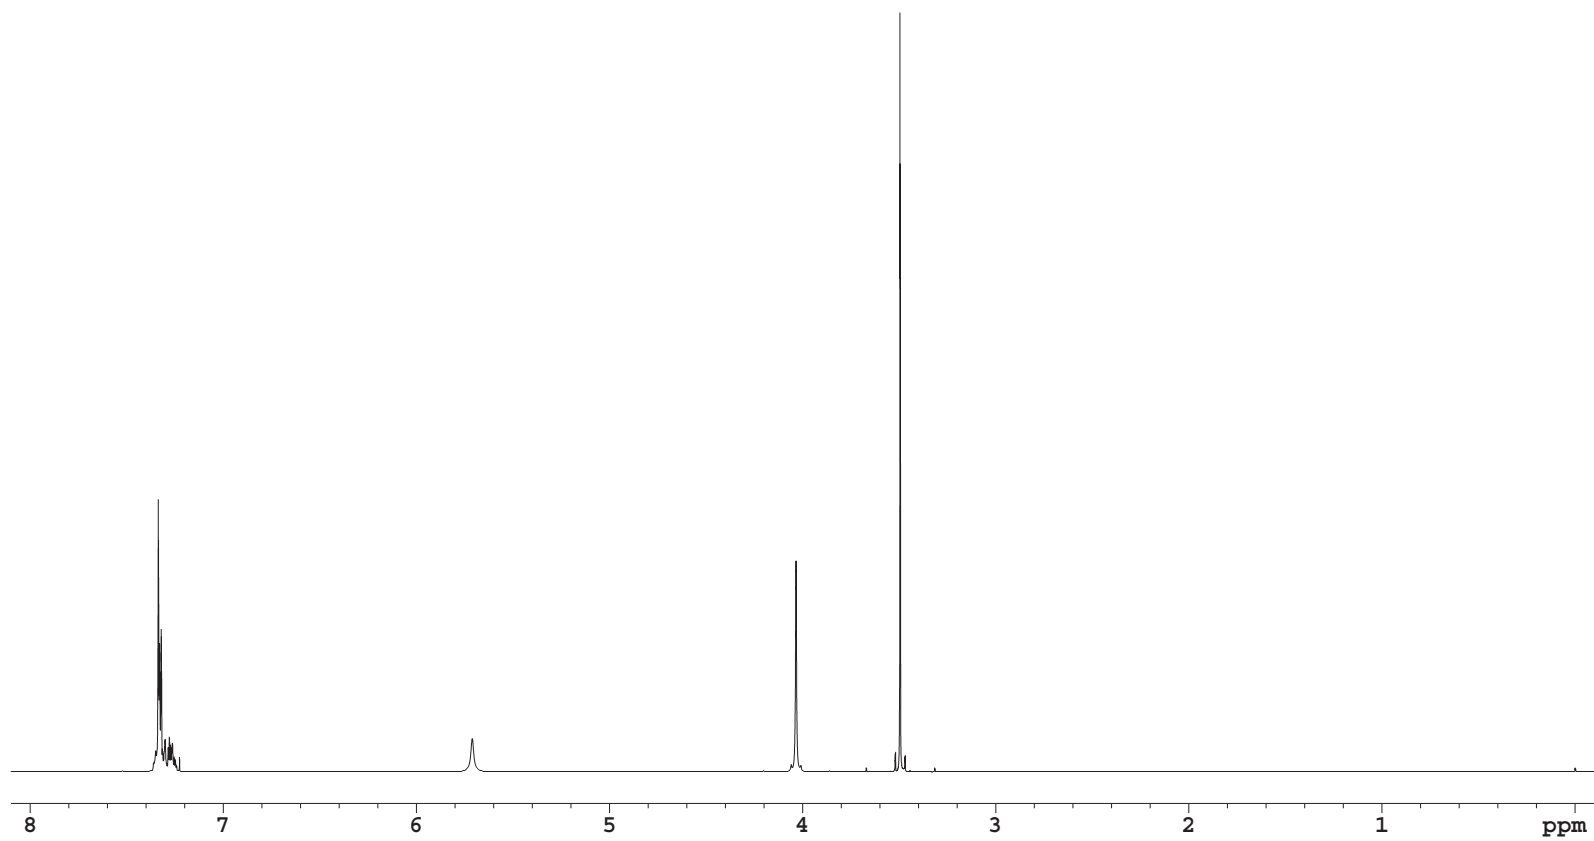

$^{13}\text{C}$ , 100 MHz,  $\text{CDCl}_3$

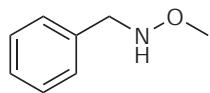

115

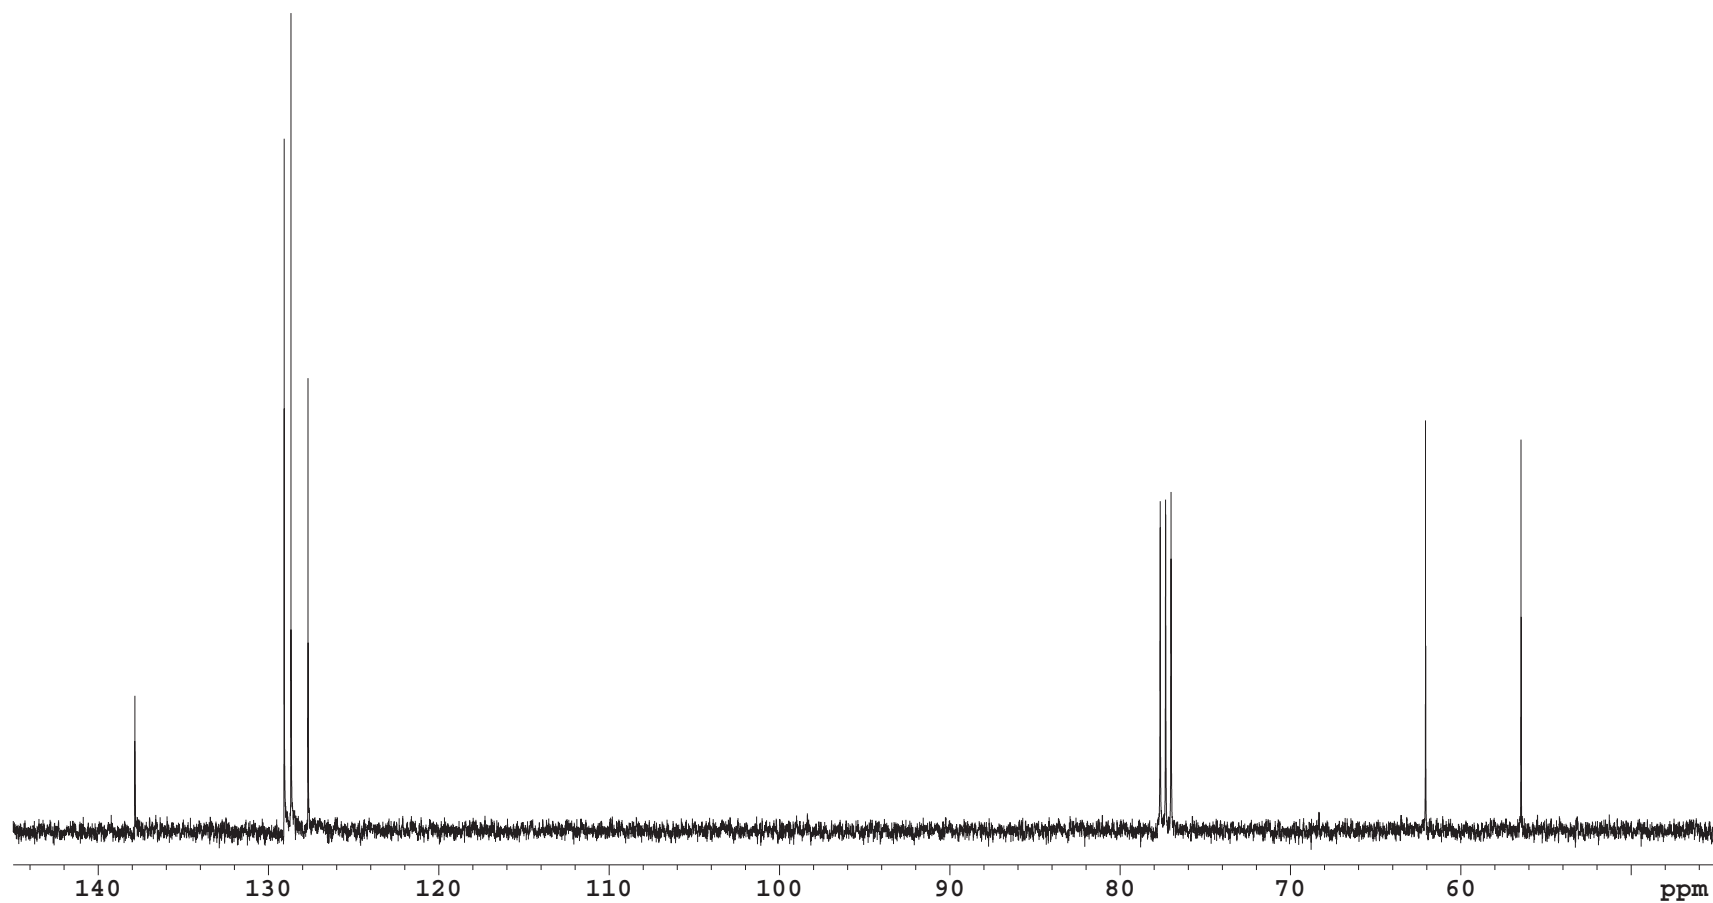

$^1\text{H}$ , 400 MHz,  $\text{CDCl}_3$

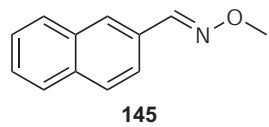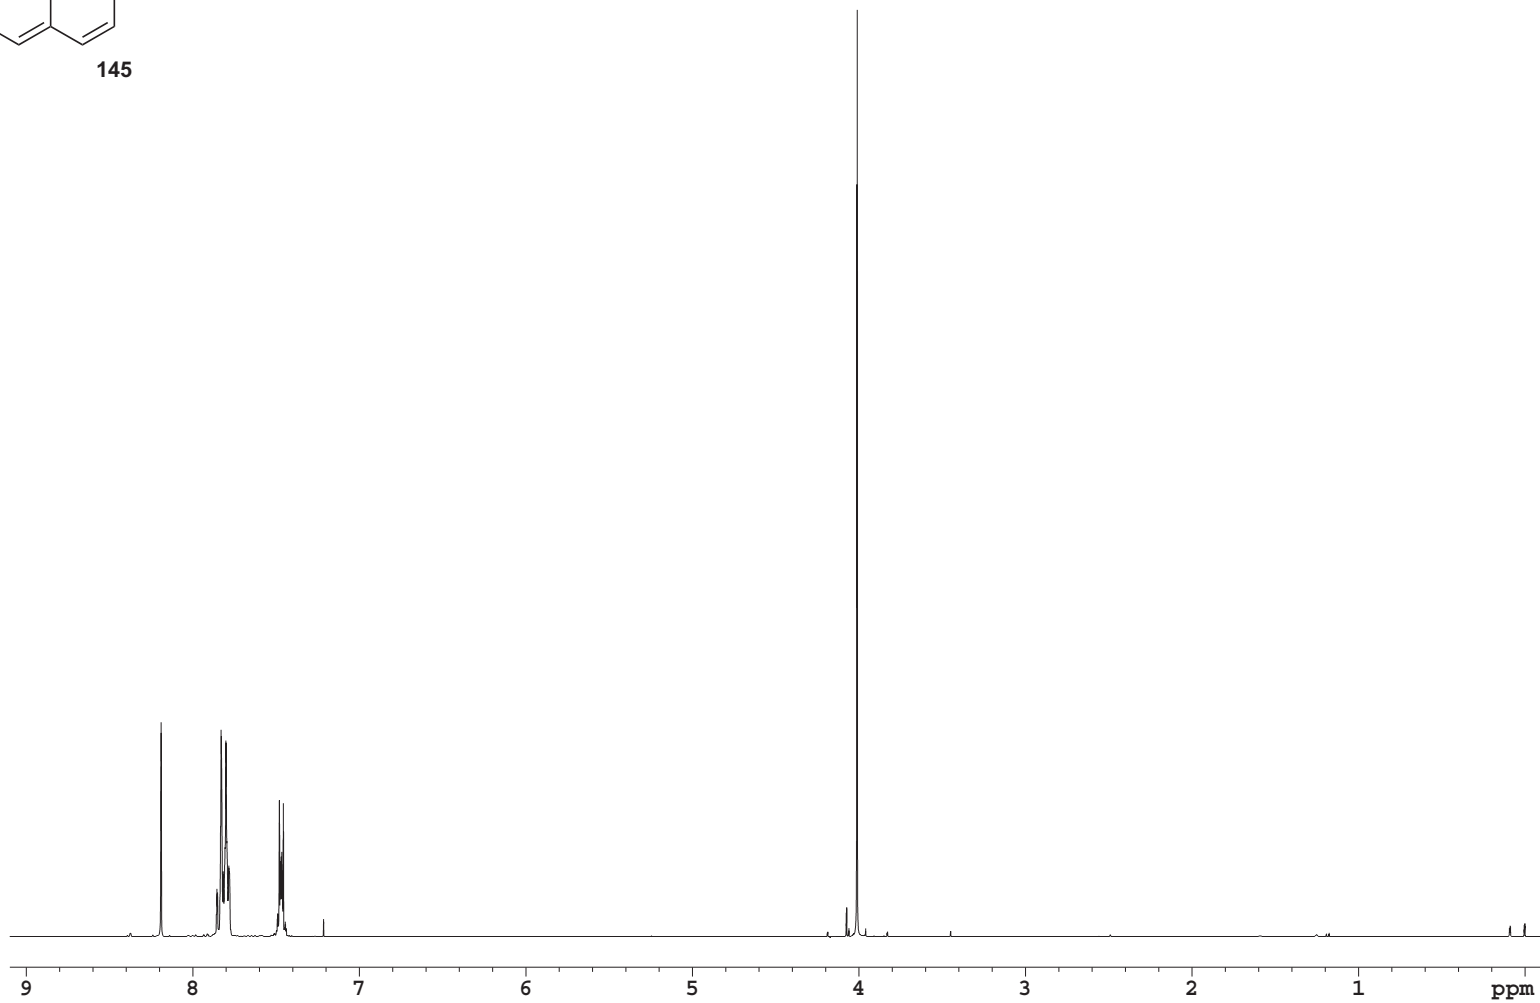

$^{13}\text{C}$ , 100 MHz,  $\text{CDCl}_3$

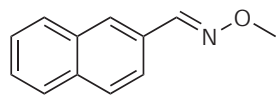

145

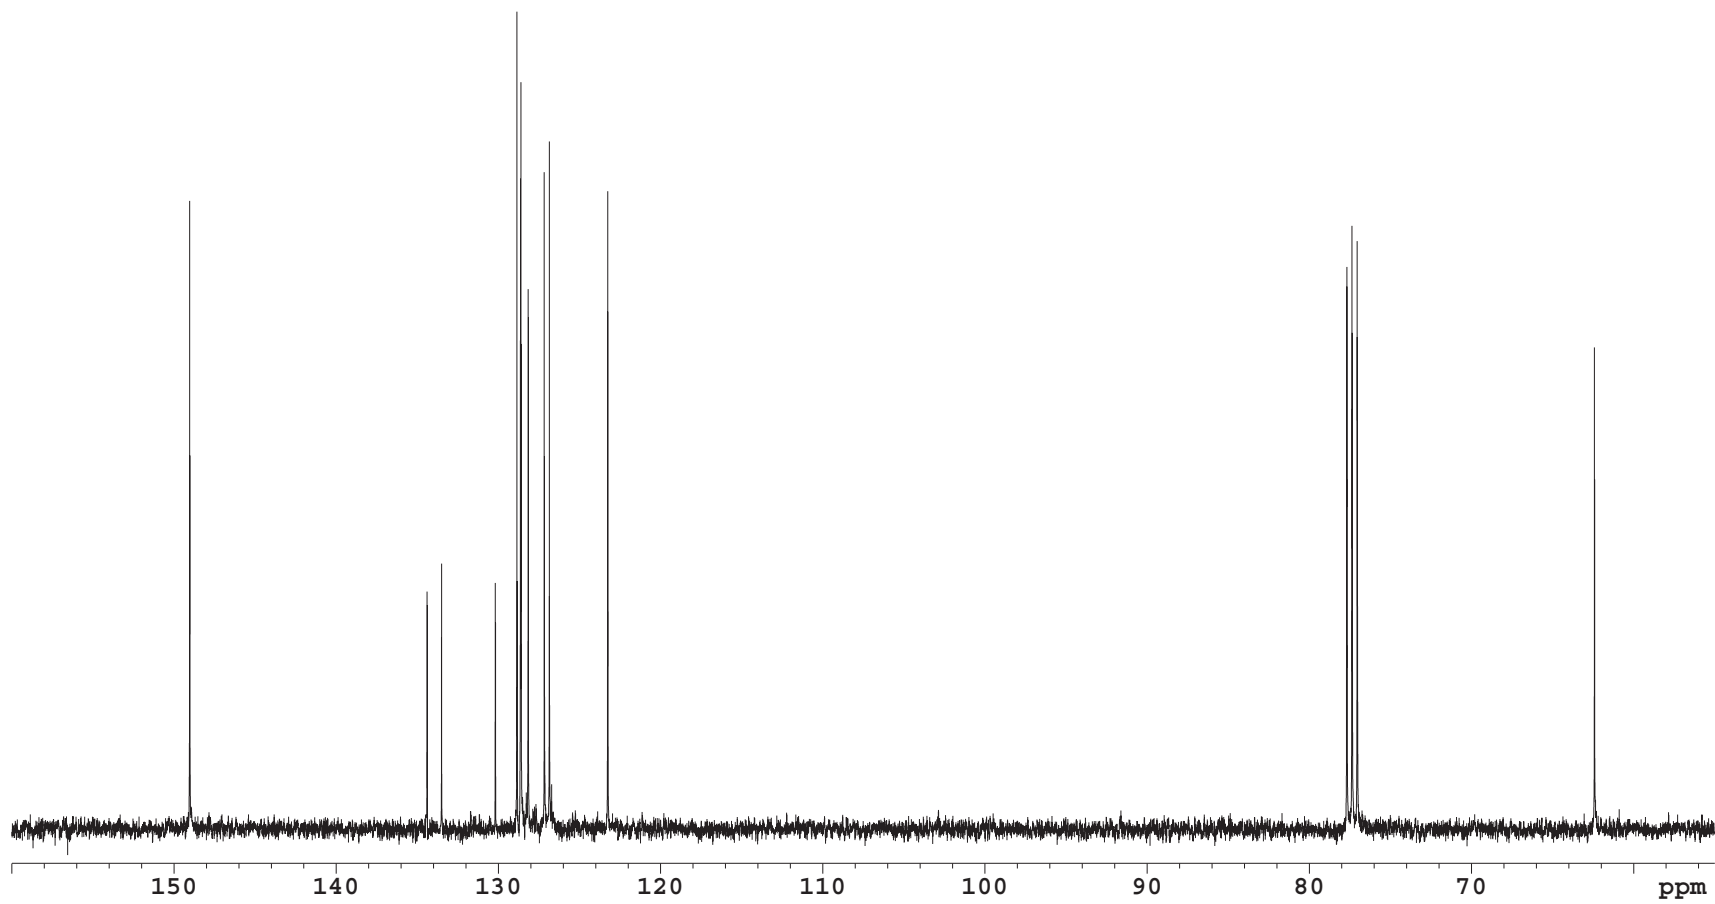

$^1\text{H}$ , 400 MHz,  $\text{CDCl}_3$

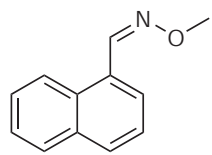

148

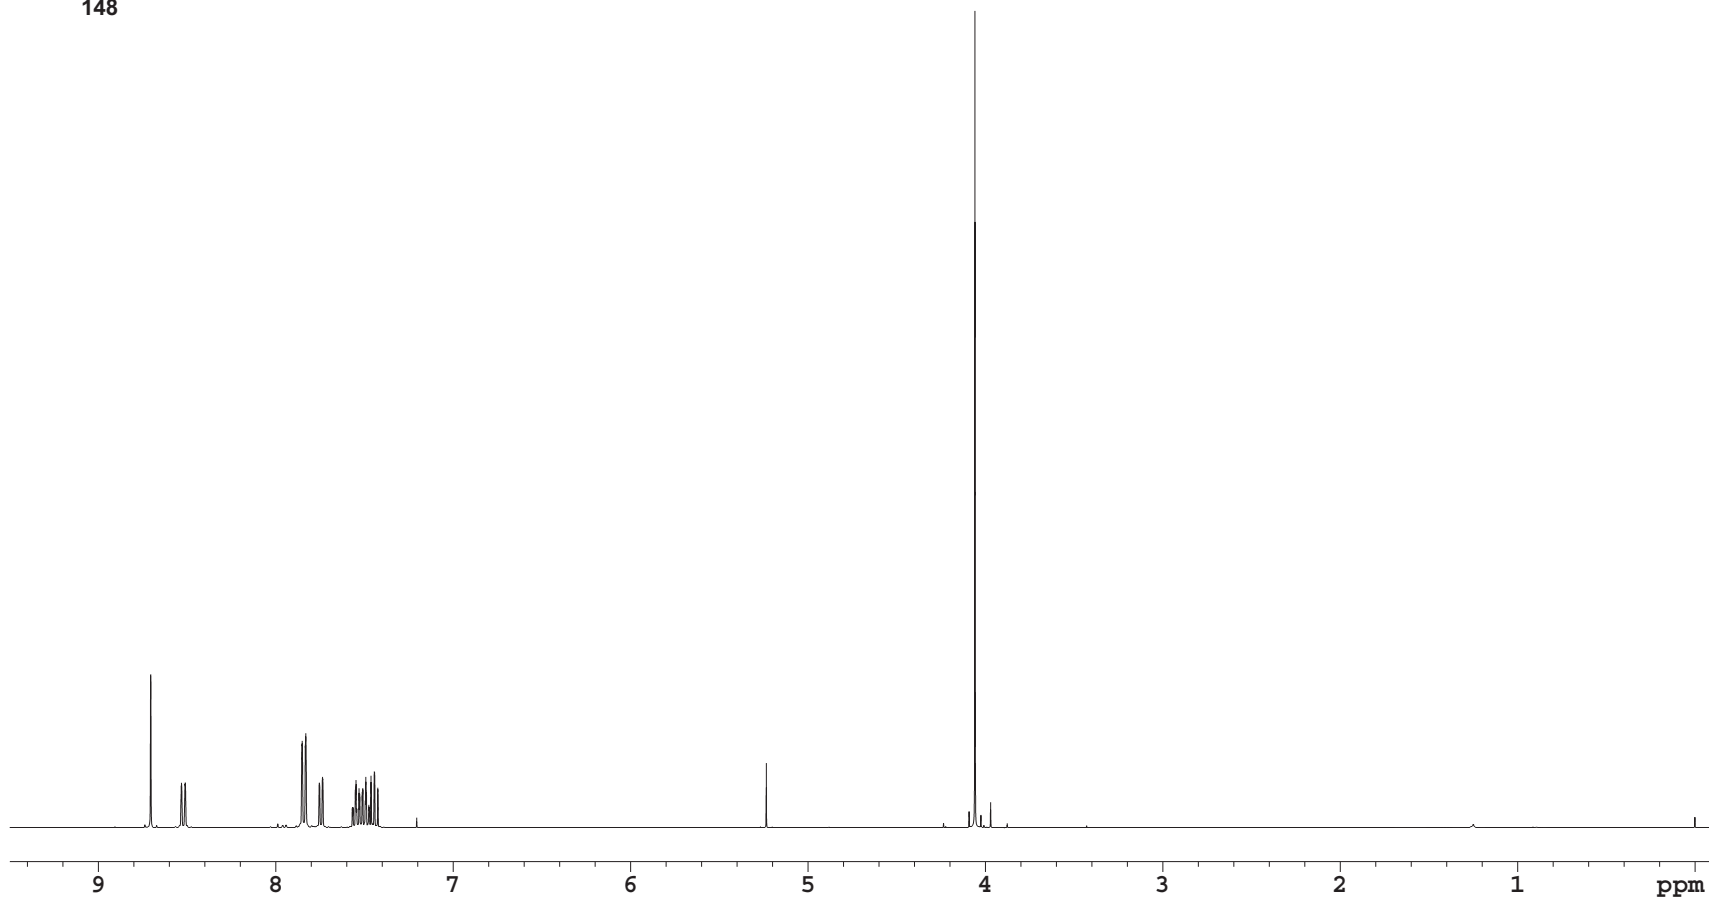

$^{13}\text{C}$ , 100 MHz,  $\text{CDCl}_3$

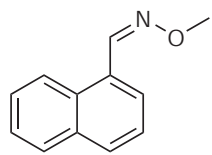

148

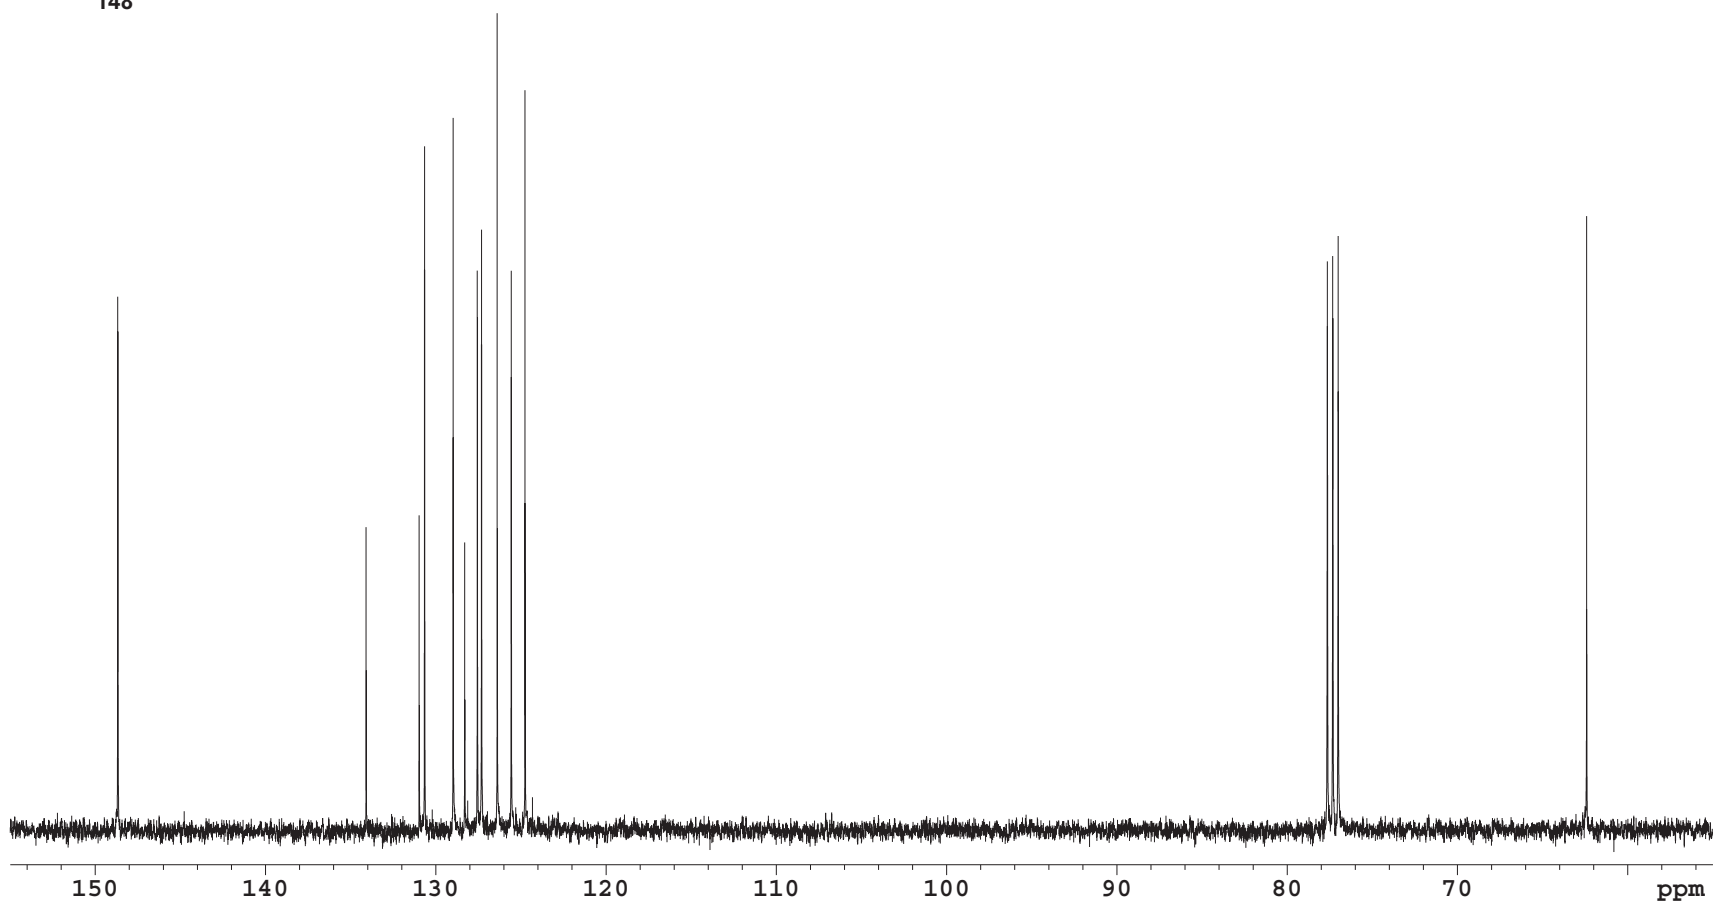



$^1\text{H}$ , 400 MHz,  $\text{CDCl}_3$

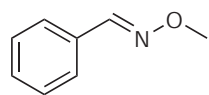

150

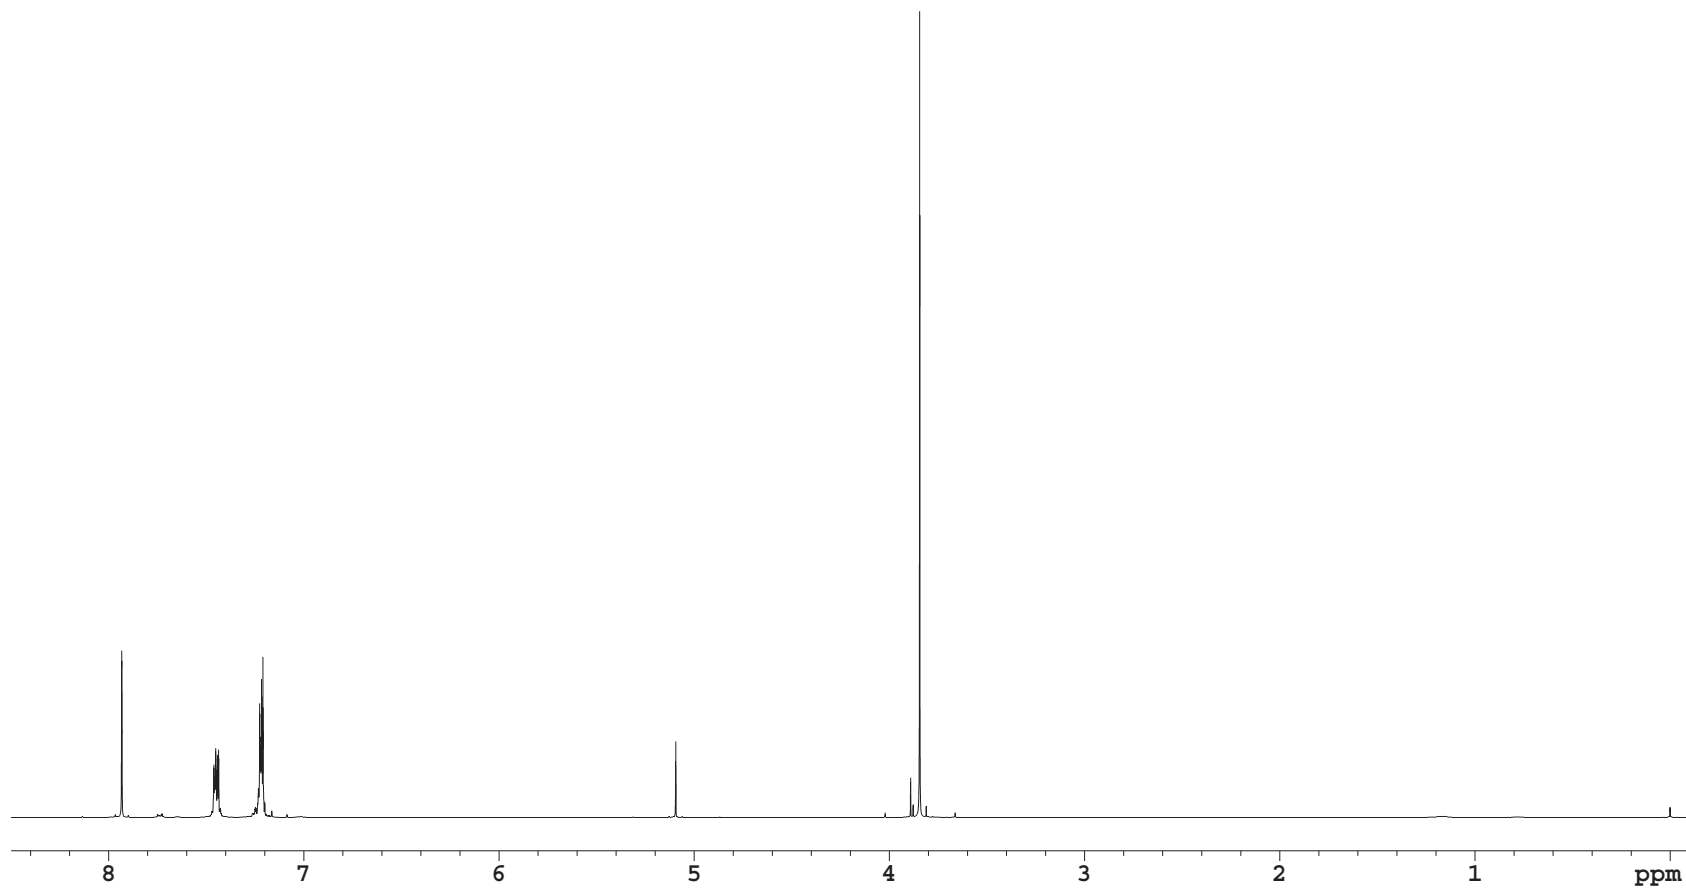

$^{13}\text{C}$ , 100 MHz,  $\text{CDCl}_3$

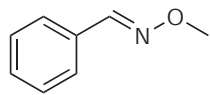

150

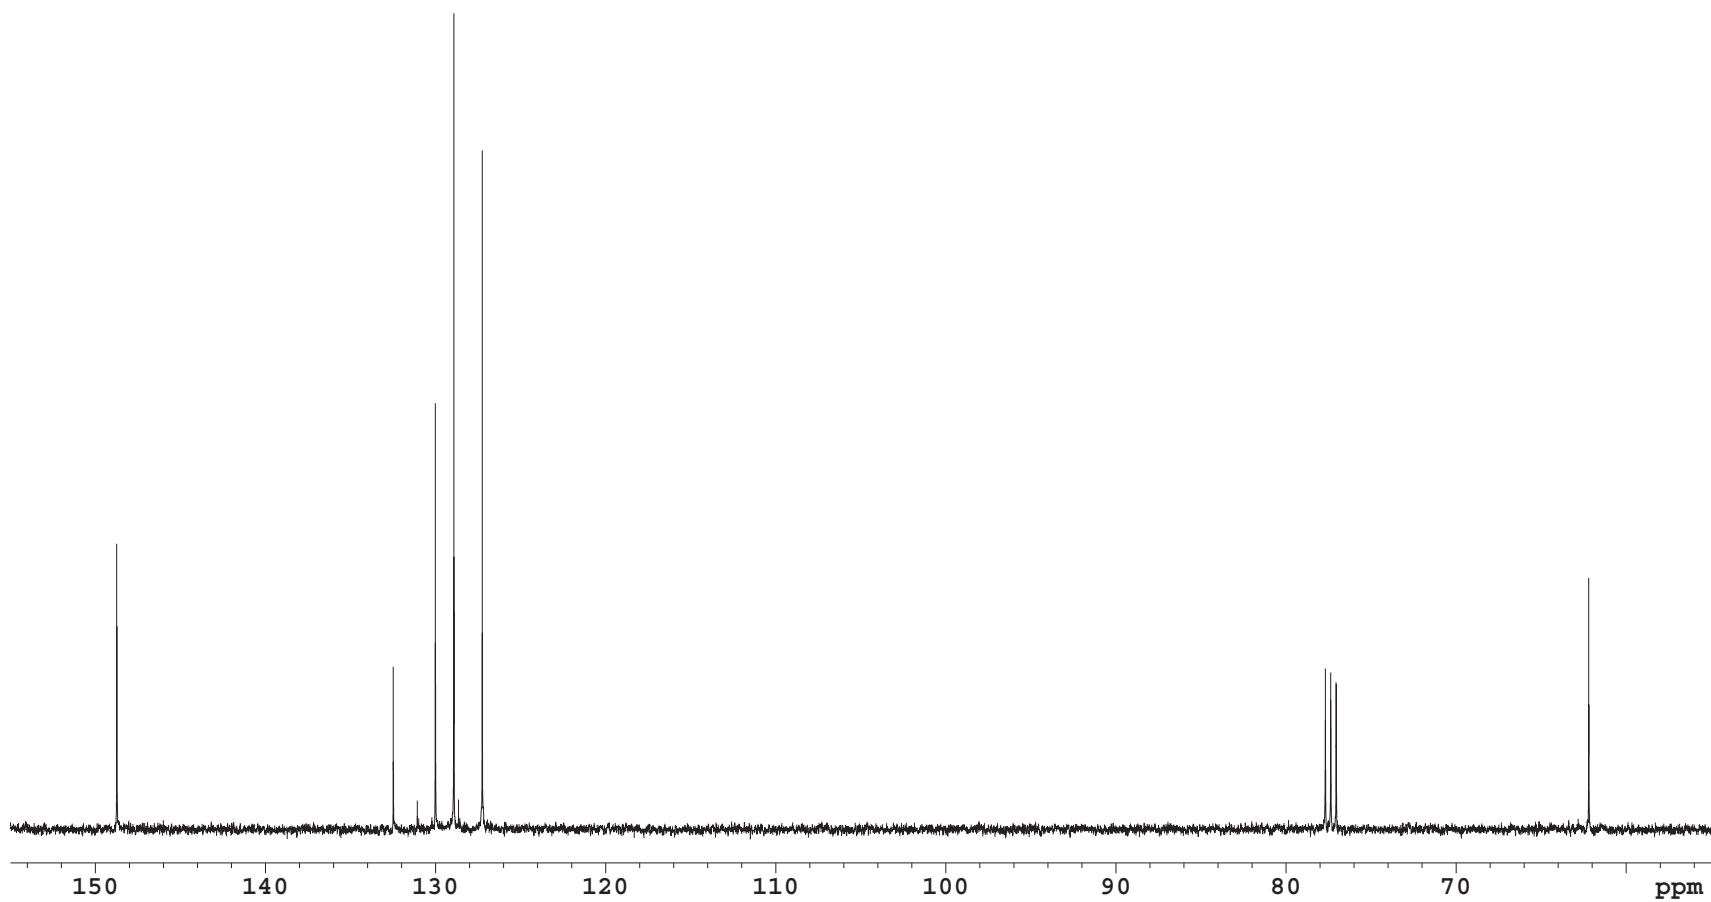

$^1\text{H}$ , 500 MHz,  $\text{CD}_3\text{OD}$

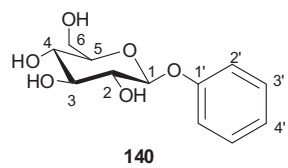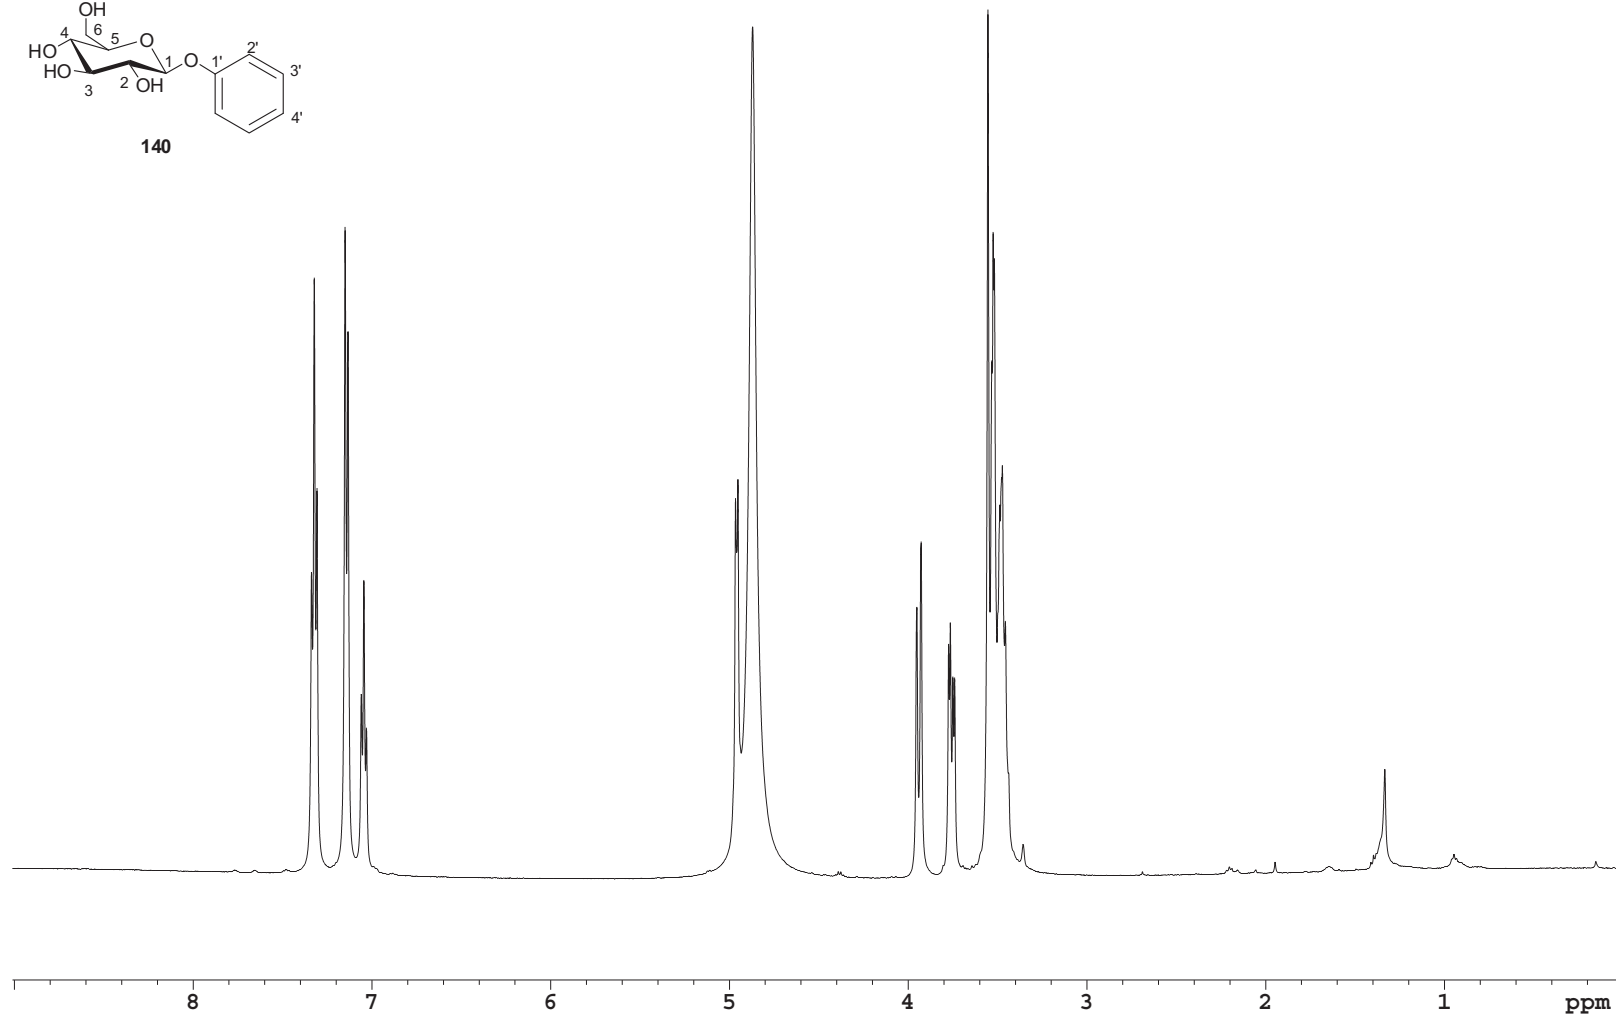

$^1\text{H}$ , 500 MHz,  $\text{CD}_3\text{OD}$

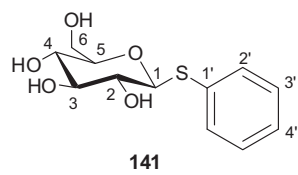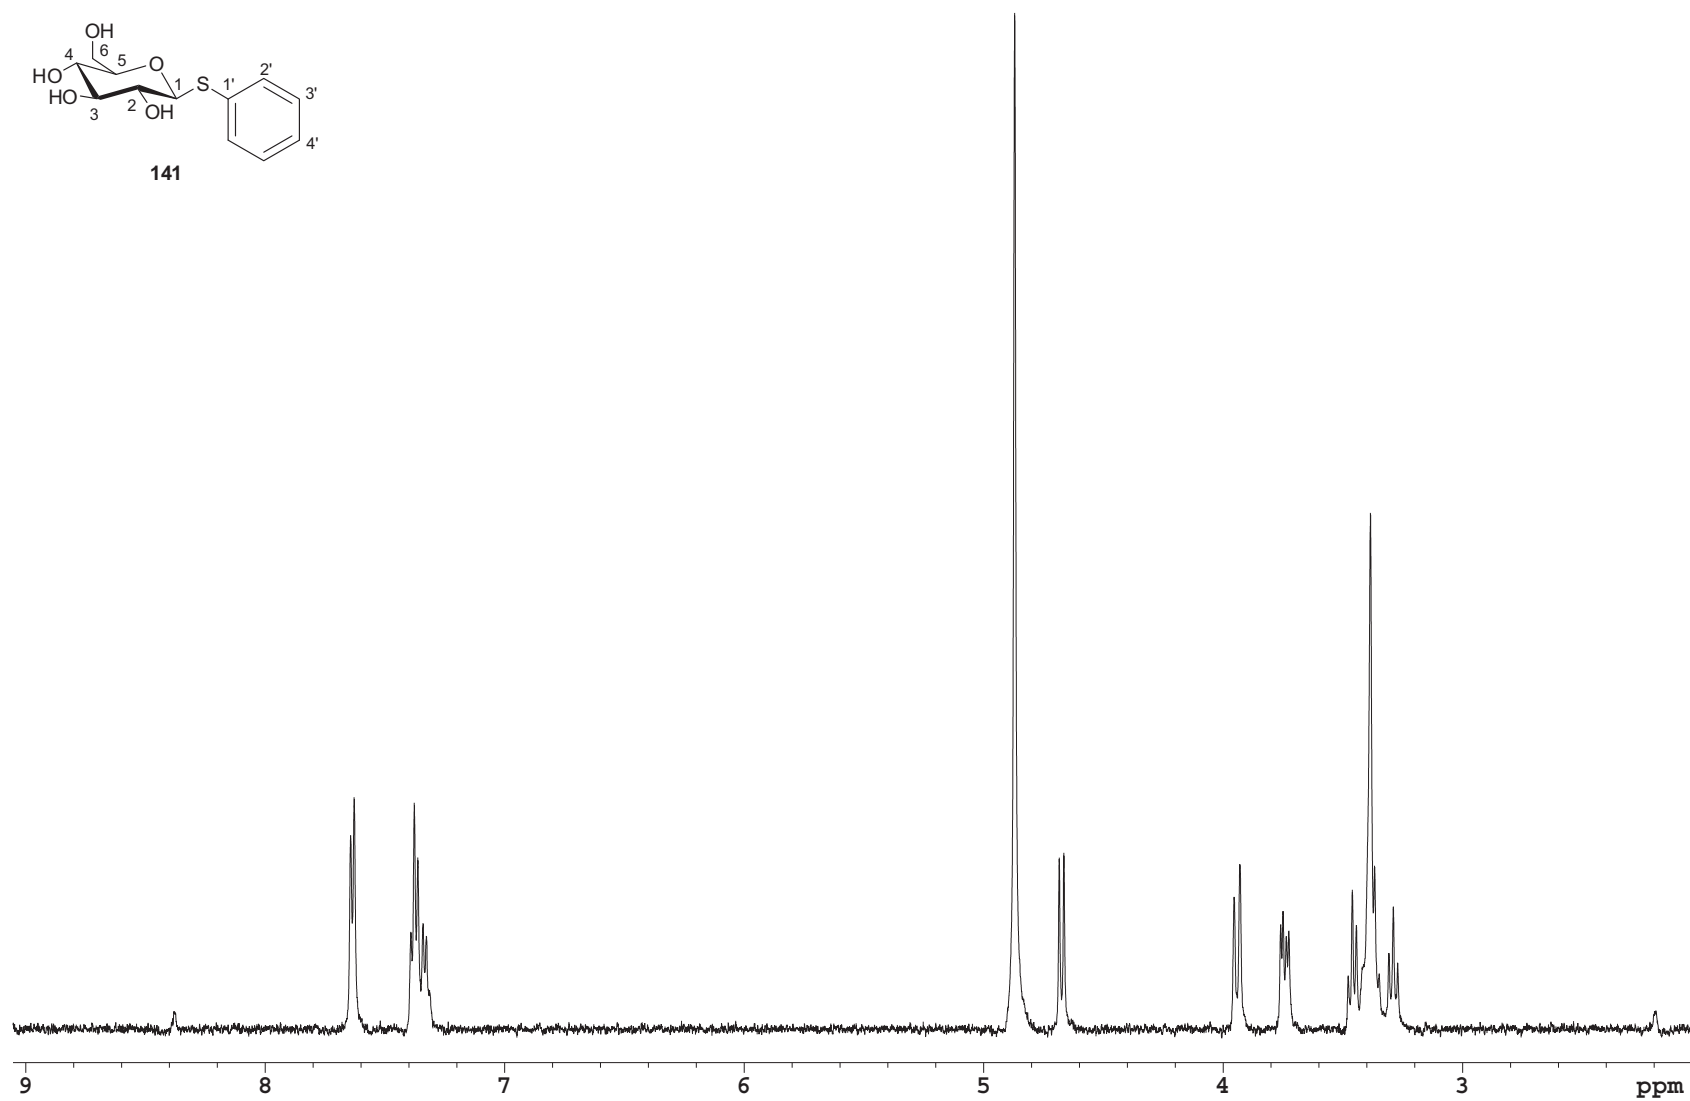

$^1\text{H}$ , 500 MHz,  $\text{CD}_3\text{OD}$

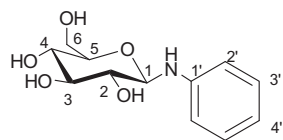

142

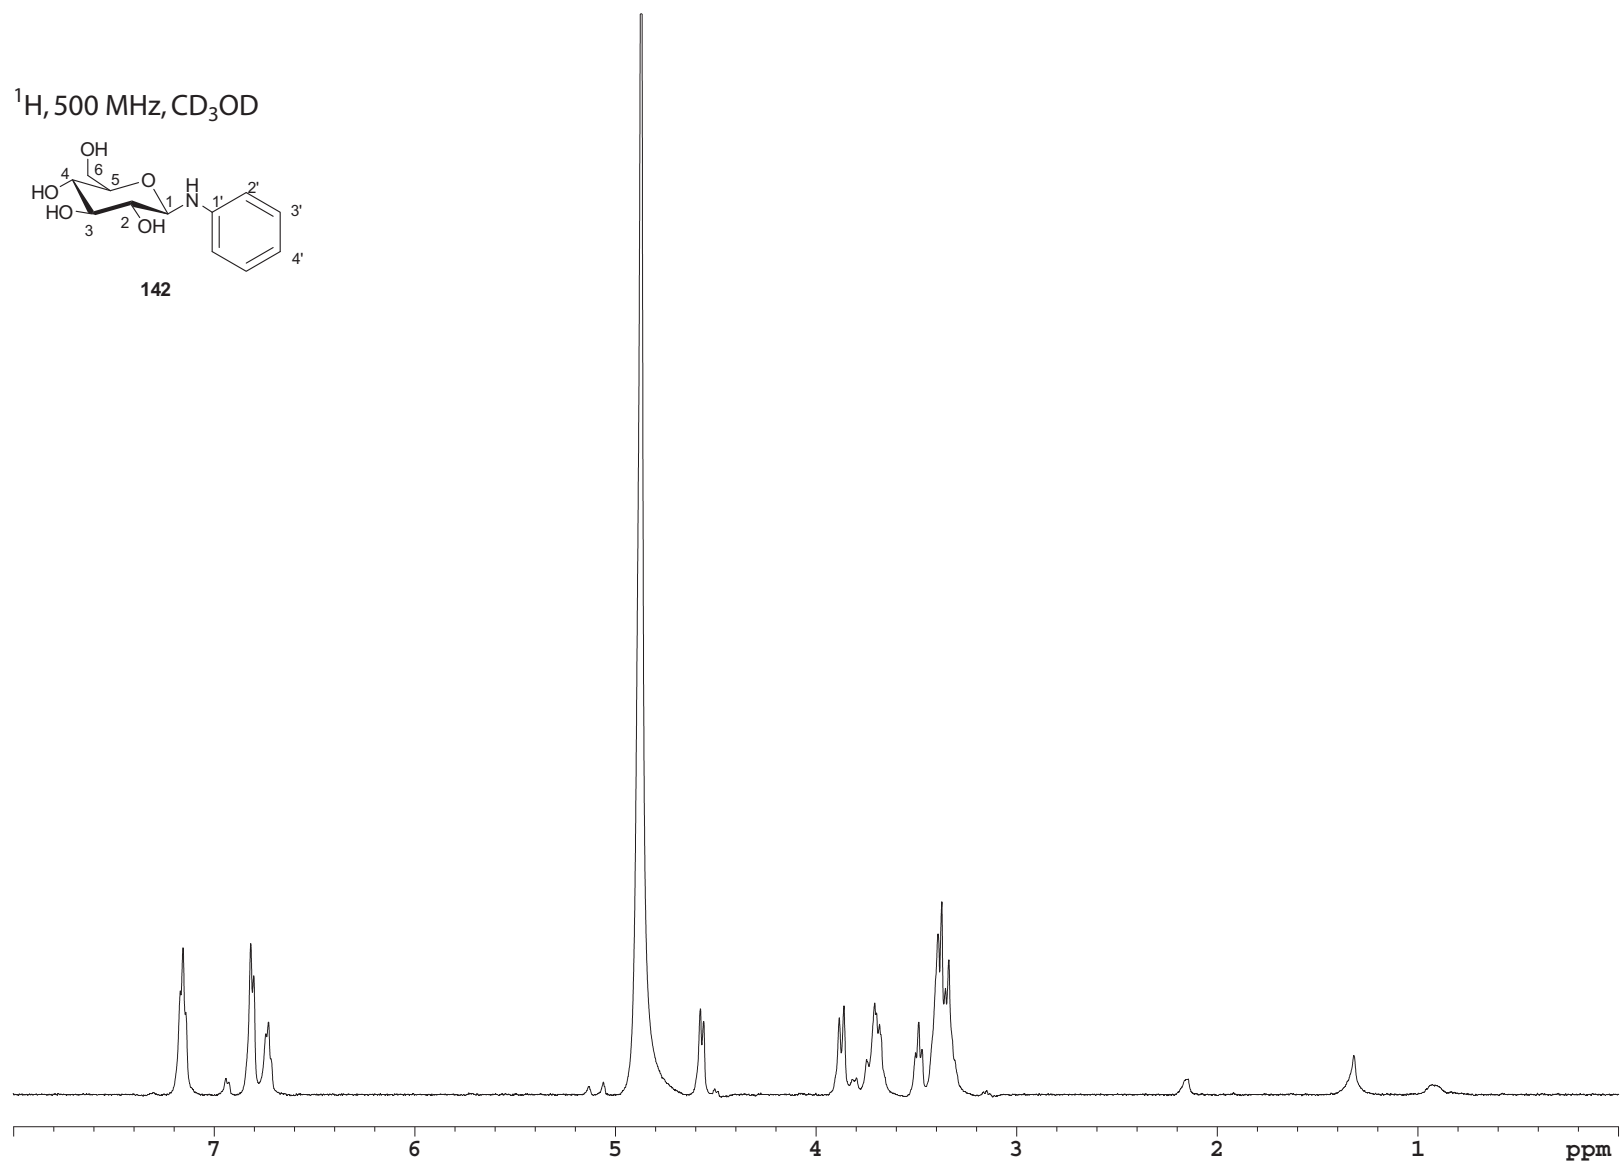

$^1\text{H}$ , 500 MHz, acetone- $\text{d}_6$

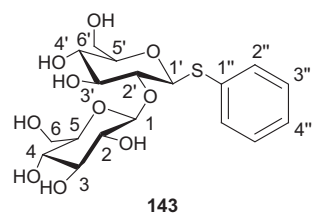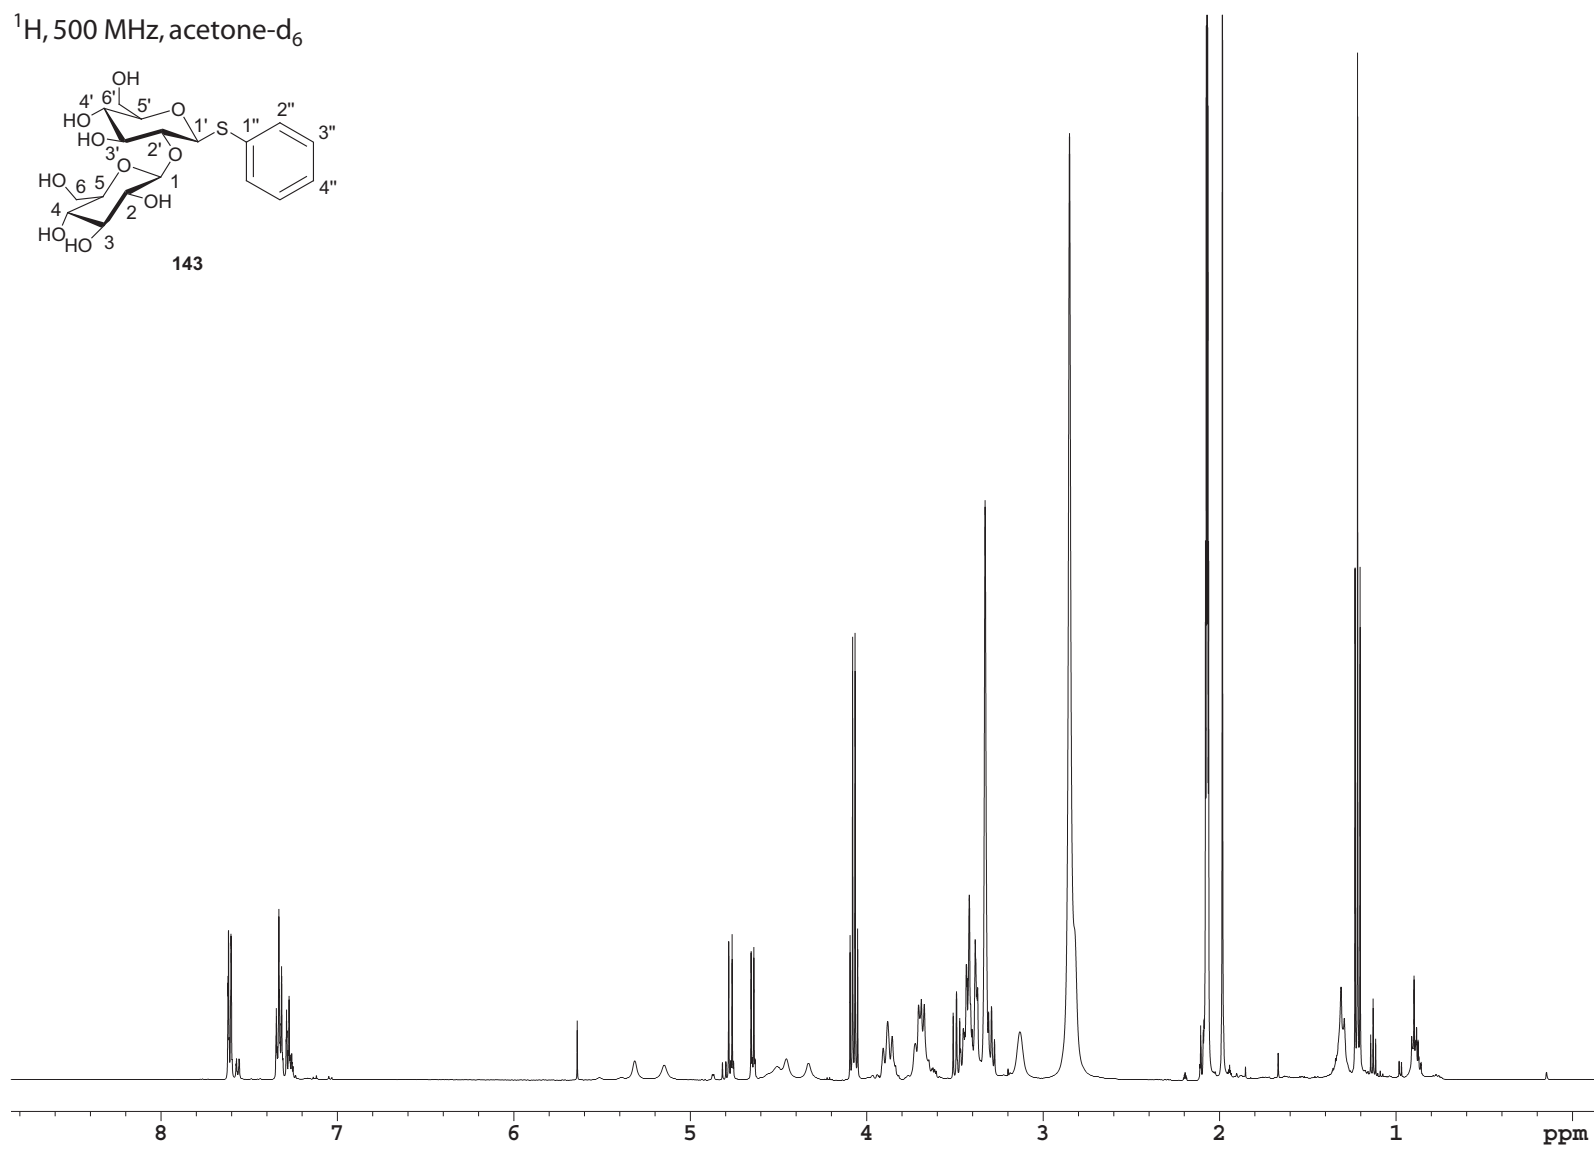

## 11. Supplementary references.

- [S1] J. M. Langenhan, N. R. Peters, I. A. Guzei, F. M. Hoffmann, J. S. Thorson, *Proc. Natl. Acad. Sci. USA* **2005**, *102*, 12305-12310.
- [S2] C. Zhang, E. Bitto, R. D. Goff, S. Singh, C. A. Bingman, B. R. Griffith, C. Albermann, G. N. Phillips Jr., J. S. Thorson, *Chem. Biol.* **2008**, In press.
- [S3] C. Zhang, C. Albermann, X. Fu, N. R. Peters, J. D. Chisholm, G. Zhang, E. J. Gilbert, P. G. Wang, D. L. Van Vranken, J. S. Thorson, *ChemBioChem* **2006**, *7*, 795-804.
- [S4] A. Ahmed, N. R. Peters, M. K. Fitzgerald, J. A. Watson Jr., F. M. Hoffmann, J. S. Thorson, *J. Am. Chem. Soc.* **2006**, *128*, 14224-14225.
- [S5] C. Zhang, C. Albermann, X. Fu, J. S. Thorson, *J. Am. Chem. Soc.* **2006**, *128*, 16420-16421.
- [S6] B. R. Griffith, C. Krepel, X. Fu, S. Blanchard, A. Ahmed, C. E. Edmiston, J. S. Thorson, *J. Am. Chem. Soc.* **2007**, *129*, 8150-8155.
- [S7] G. J. Williams, C. Zhang, J. S. Thorson, *Nat. Chem. Biol.* **2007**, *3*, 657-662.
